# Supplementary material for: Changes in the metabolic potential of the sponge microbiome under ocean acidification
Source: PubMed Central journal article supplement (PMC6742649; doi:10.1038/s41467-019-12156-y), 2019-09-12
Supplement: 41467_2019_12156_MOESM1_ESM.pdf [file 41467_2019_12156_MOESM1_ESM.pdf]

## **Supplementary Information**

### **Changes in the metabolic potential of the sponge microbiome under ocean acidification**

Botté et al.

## Supplementary Figures

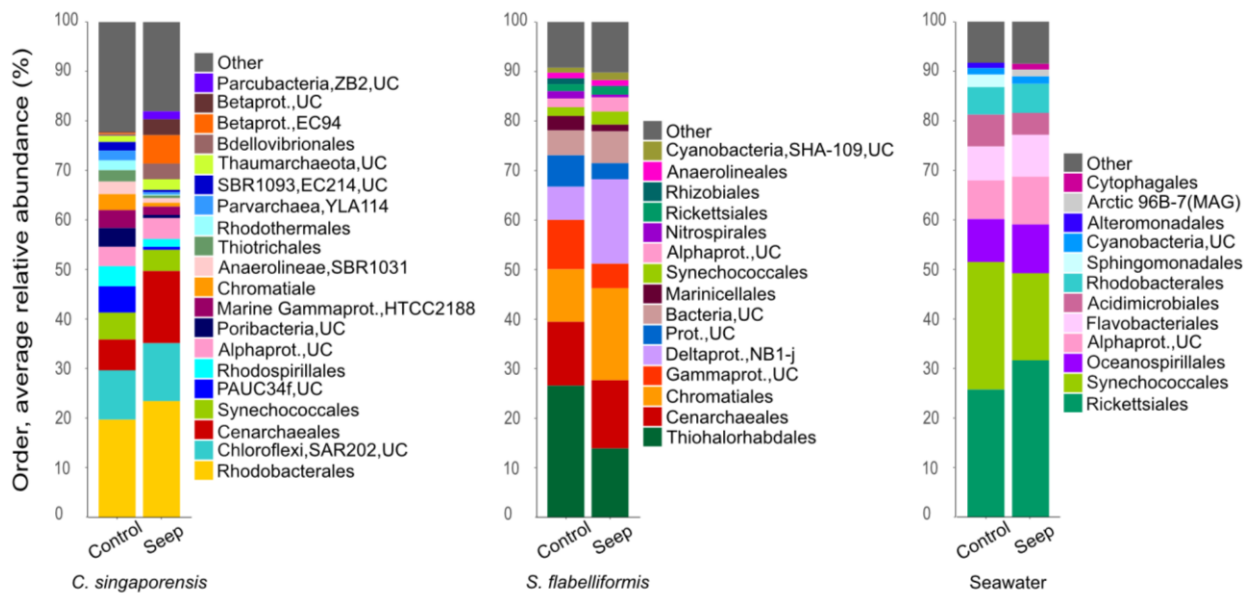

**Supplementary Figure 1. Taxonomic composition of the sponge microbiome, summarised at the taxonomic rank of Order.** Classification derived from GraftM analysis. Only taxa with relative abundances >1% in either control or seep are shown. UC: Unclassified; prot.: proteobacteria; Gemmat.: Gemmatimonadetes, MAG: Marine Group A.

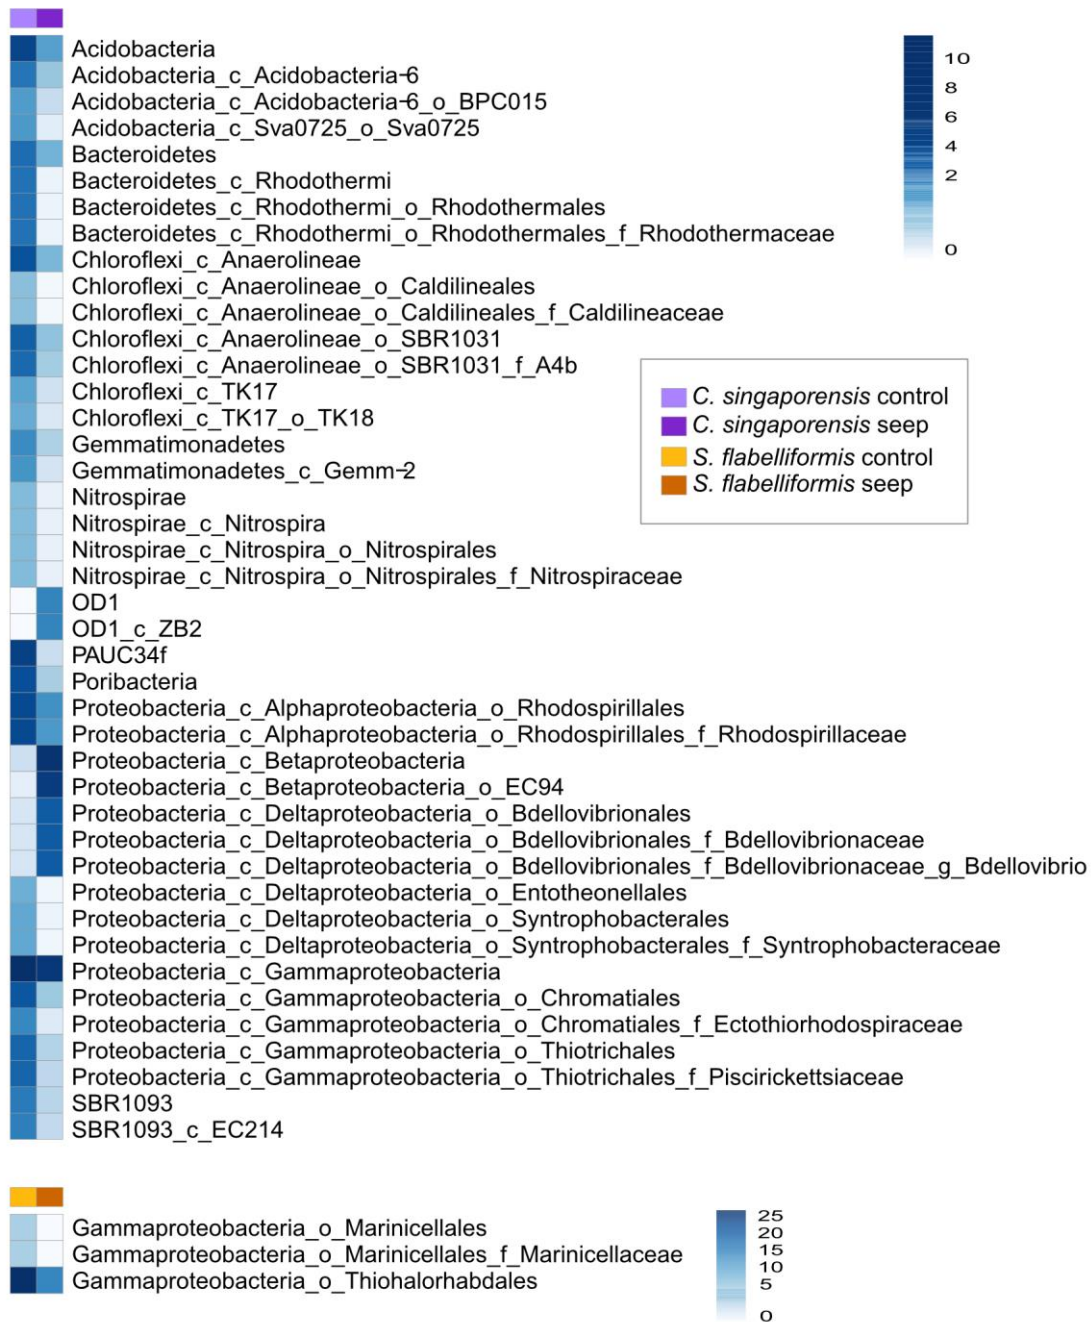

**Supplementary Figure 2. Taxa with significantly different abundances between sites.** Heatmaps show relative abundance. Classification derived from GraftM. Only taxa with an abundance > 1% are shown. Statistical significance was derived from ANOVA. Source data are provided as a Source Data file.

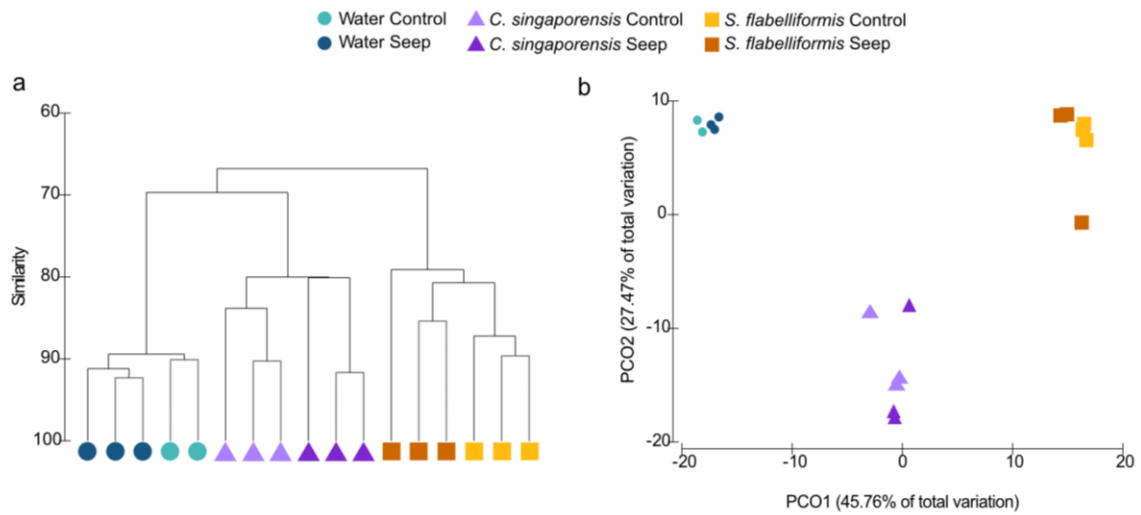

**Supplementary Figure 3. Variation between replicates and sample types based on functional genes (KO) visualised as hierarchical clustering (a) and Principal Component Analysis (b) based on Bray-Curtis resemblance matrix with rarefied relative abundance as raw data.**

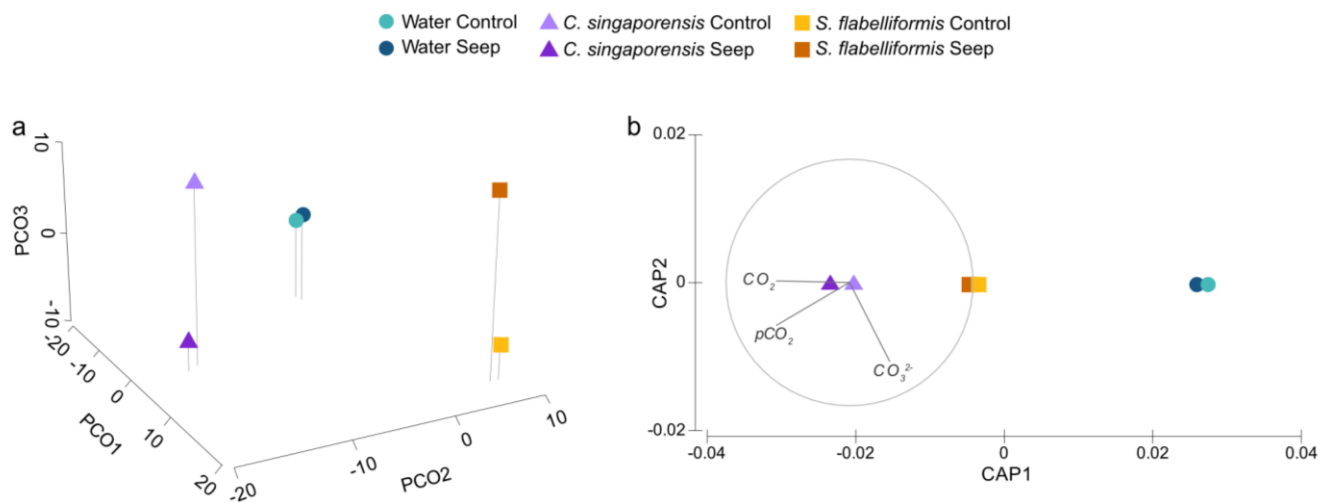

**Supplementary Figure 4. Partitioning of samples based on Bray-Curtis resemblance matrix of the mean of rarefied relative abundance of functional genes (KO) per species, visualised as (a) Principal Component Ordination with 3 axes and (b) Canonical Analysis of Principal Coordinates showing environmental variables with  $R > 0.5$  as vectors.**

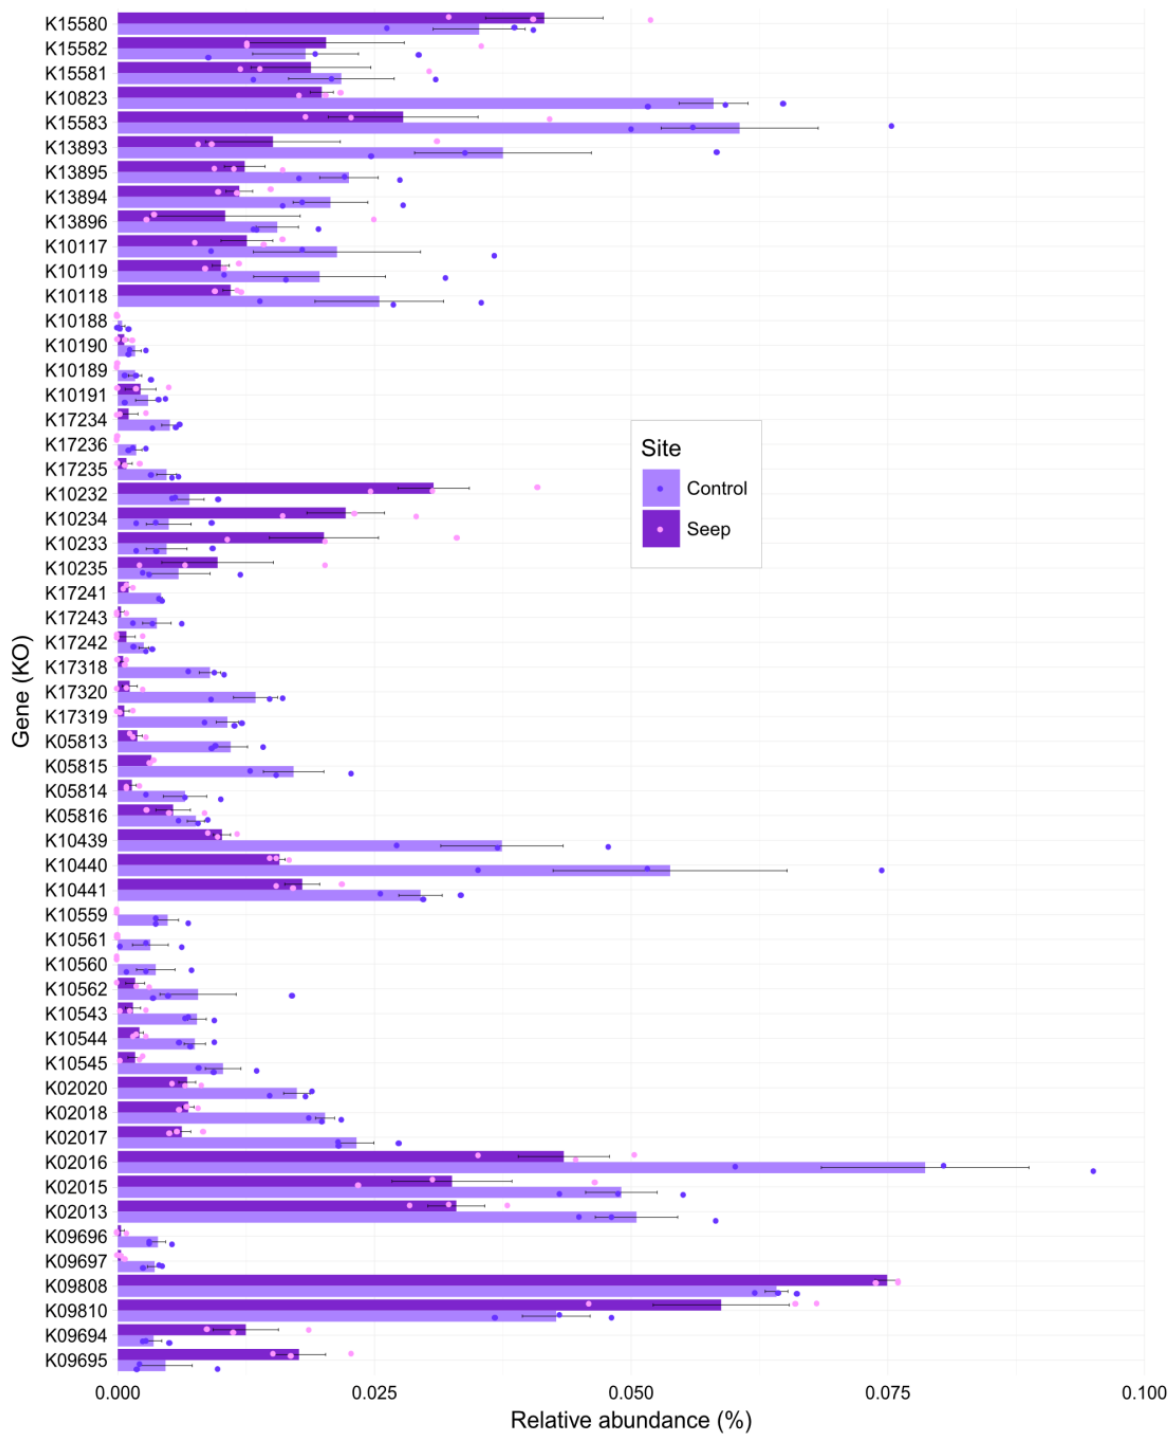

**Supplementary Figure 5. Functions involved in import and/or export of molecules and compounds in *C. singaporensis*.** Mean ( $n = 3 \pm \text{s.e.m}$ ) relative abundance calculated on rarefied counts and expressed as a percentage. Source data are provided as a Source Data file.

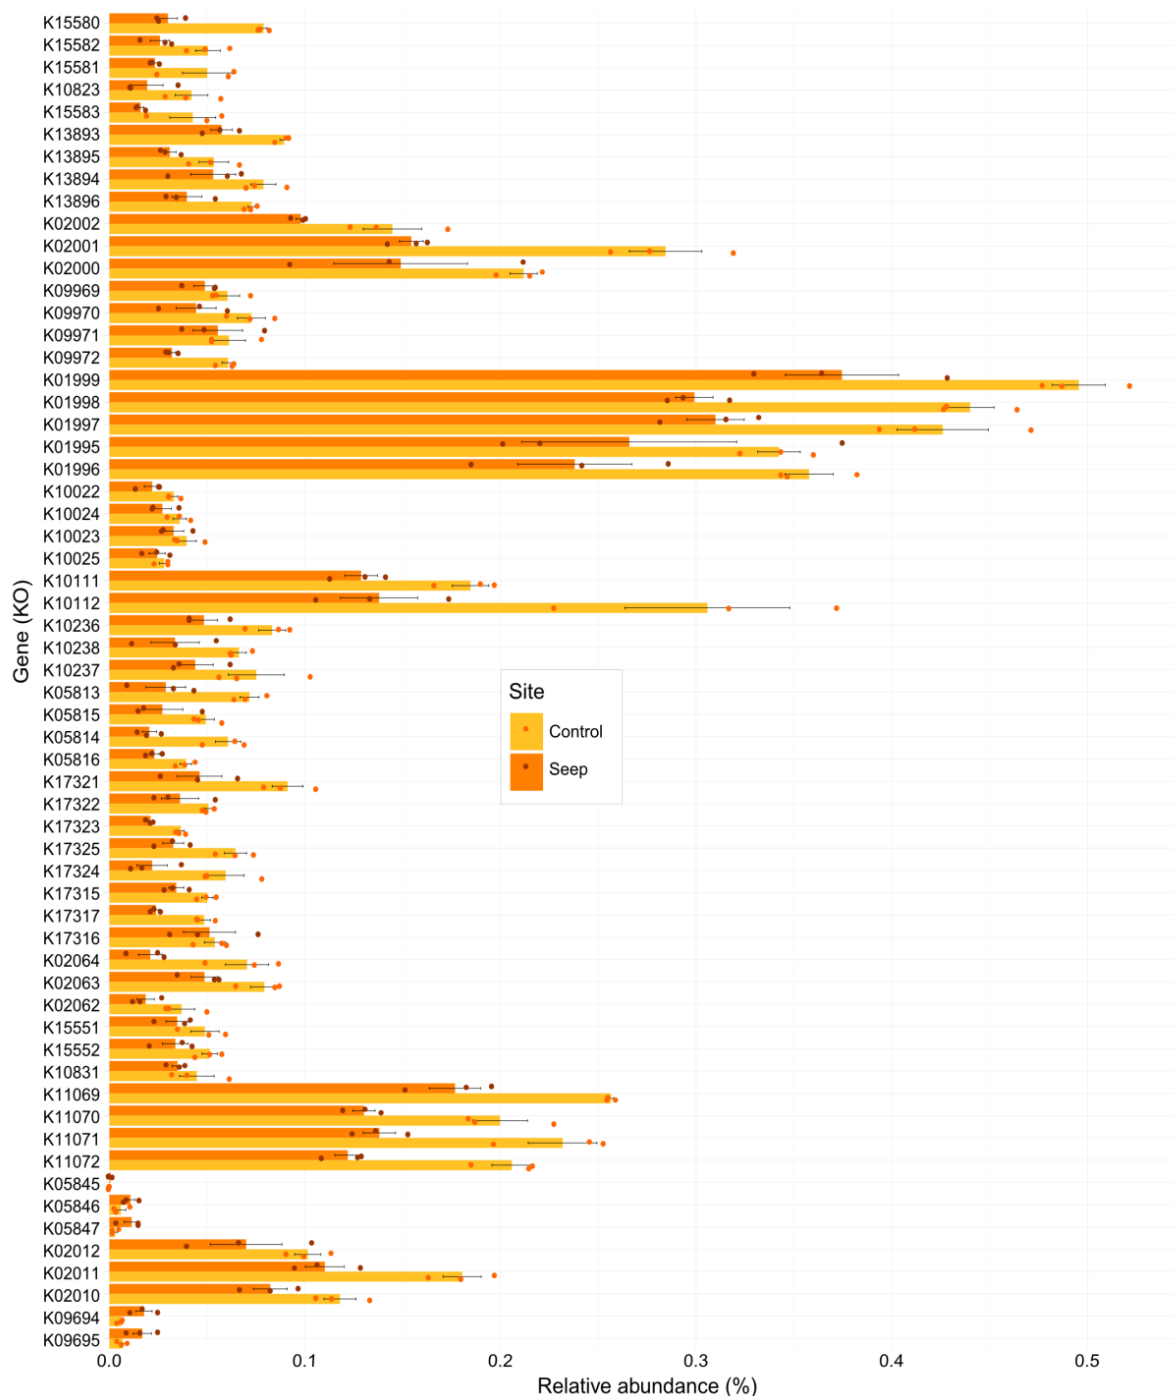

**Supplementary Figure 6. Functions involved in import and/or export of molecules and compounds in *S. flabelliformis*.** Mean ( $n = 3 \pm \text{s.e.m}$ ) relative abundance calculated on rarefied counts and expressed as a percentage. Source data are provided as a Source Data file.

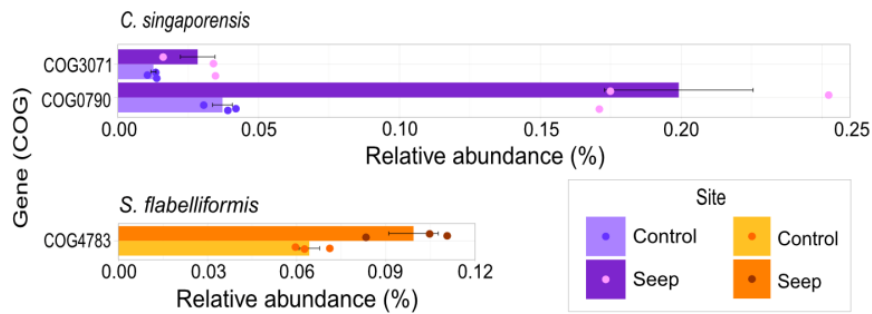

**Supplementary Figure 7. Functions encoding Eukaryotic-Like Proteins in *C. singaporensis* and *S. flabelliformis* metagenomes.** Mean ( $n = 3 \pm \text{s.e.m}$ ) relative abundance calculated on rarefied counts and expressed as a percentage. Source data are provided as a Source Data file.

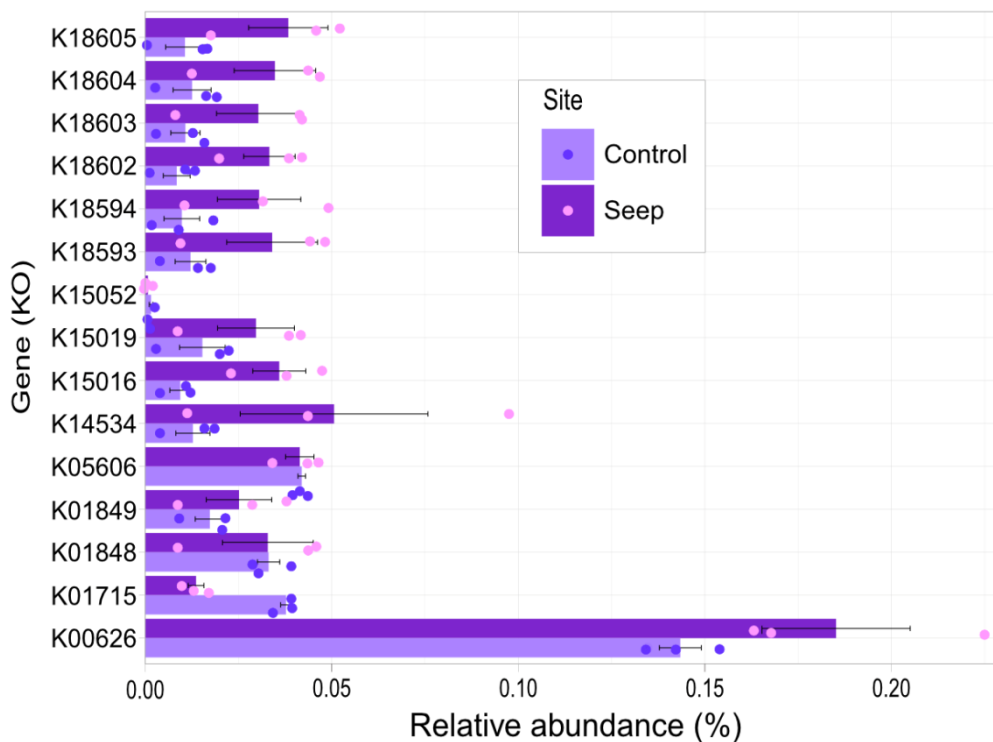

**Supplementary Figure 8. Functions (KOs) involved in the HP/HB cycle in *C. singaporensis* metagenomes.** Mean ( $n = 3 \pm \text{s.e.m}$ ) relative abundance calculated on rarefied counts and expressed as a percentage. Source data are provided as a Source Data file.

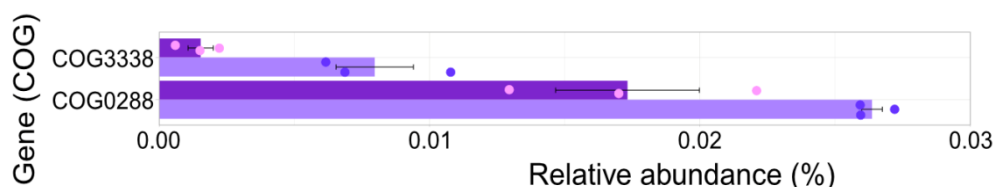

**Supplementary Figure 9. Functions (COGs) encoding carbonic enhydrase in *C. singaporensis* metagenomes.** Mean ( $n = 3 \pm \text{s.e.m}$ ) relative abundance calculated on rarefied counts and expressed as a percentage. Source data are provided as a Source Data file.

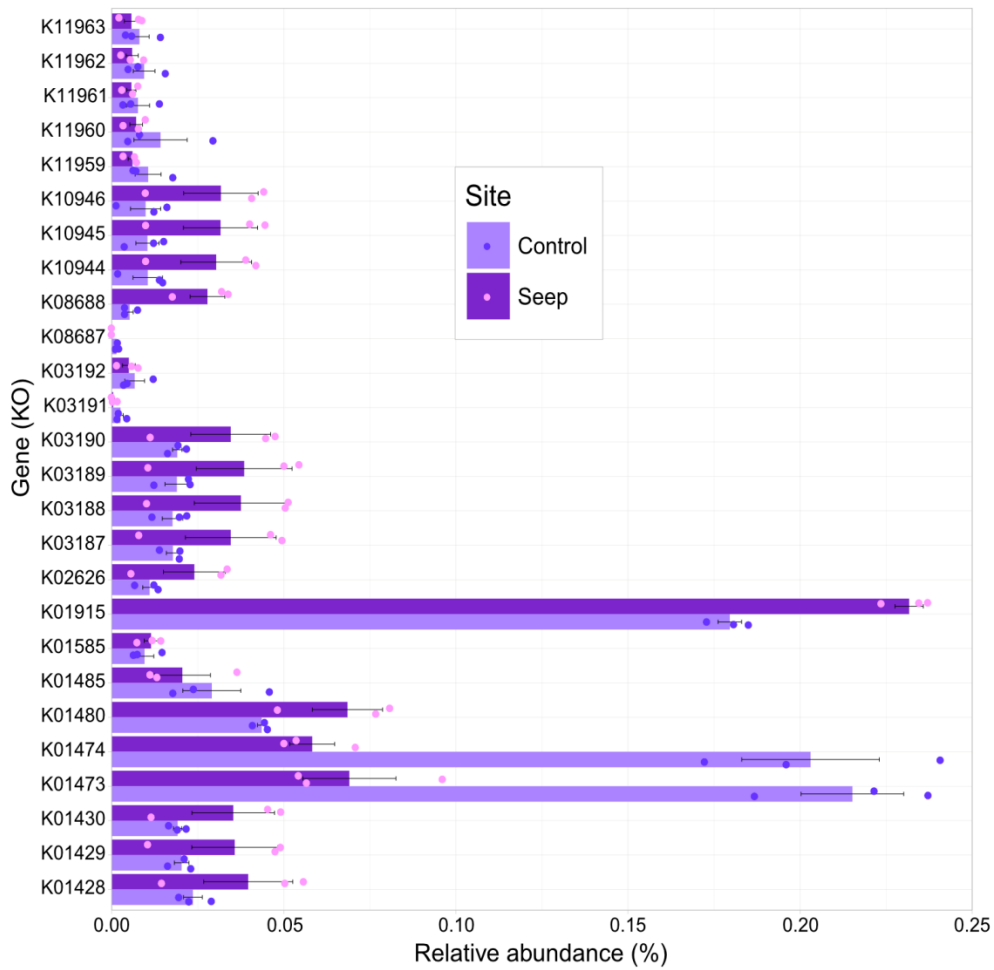

**Supplementary Figure 10.** Functions involved in creatine and creatinine degradation, arginine-driven urea production and urea degradation in *C. singaporensis*. Mean ( $n = 3 \pm$  s.e.m) relative abundance calculated on rarefied counts and expressed as percentage. Source data are provided as a Source Data file.

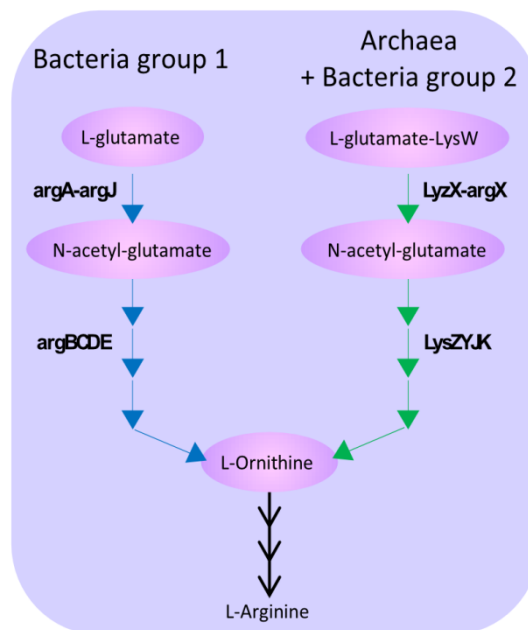

**Supplementary Figure 11.** Schematic of simplified arginine biosynthesis in Bacteria and Archaea.



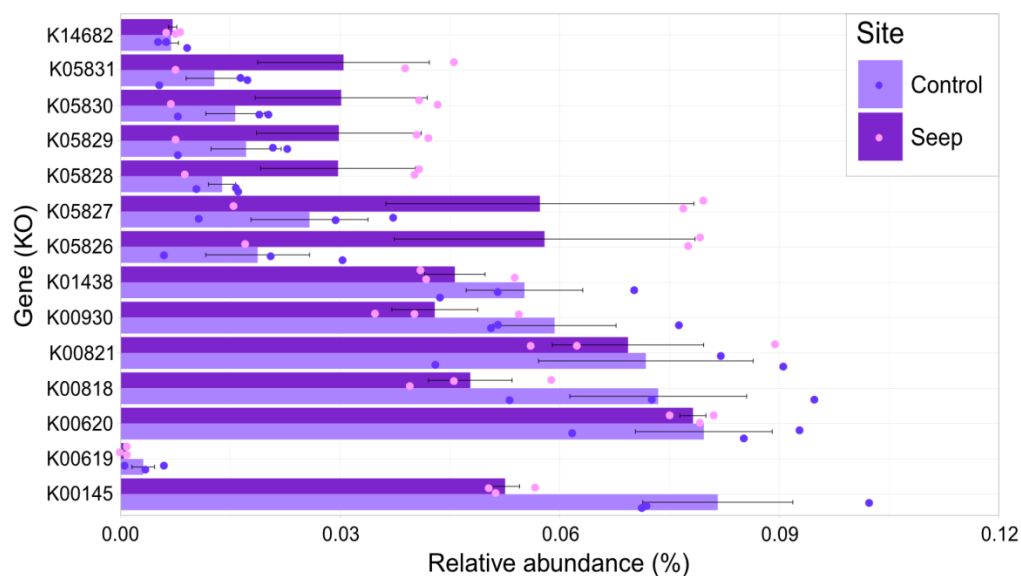

**Supplementary Figure 12. Functions involved in arginine biosynthesis in *C. singaporensis*.** Mean ( $n = 3 \pm \text{s.e.m}$ ) relative abundance calculated on rarefied counts and expressed as percentage. Source data are provided as a Source Data file.

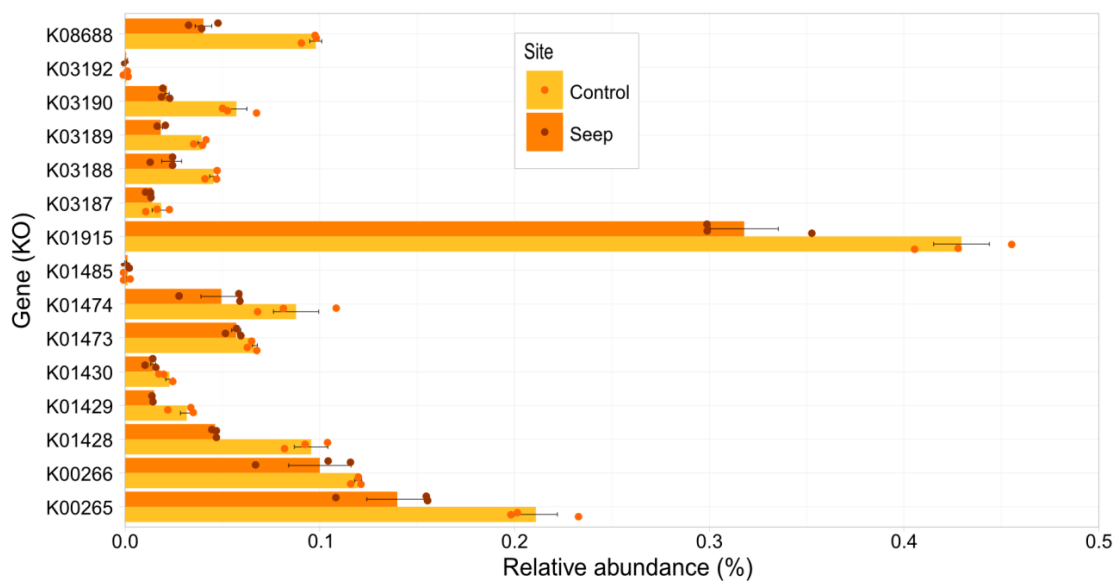

**Supplementary Figure 13. Functions involved in creatine and creatinine degradation, urea production and urea degradation in *S. flabelliformis*.** Mean ( $n = 3 \pm \text{s.e.m}$ ) relative abundance calculated on rarefied counts and expressed as a percentage. Source data are provided as a Source Data file.

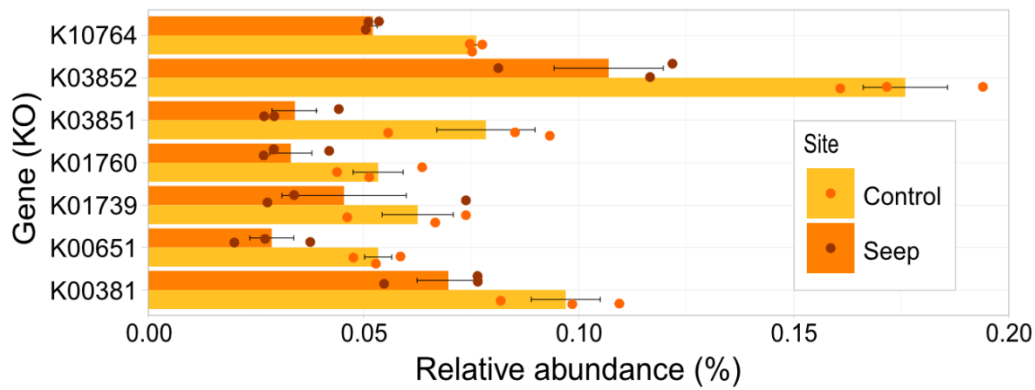

**Supplementary Figure 14. Functions involved in taurine degradation and sulfide assimilation in *S. flabelliformis*.** Mean ( $n = 3 \pm \text{s.e.m}$ ) relative abundance calculated on rarefied counts and expressed as a percentage. Source data are provided as a Source Data file.

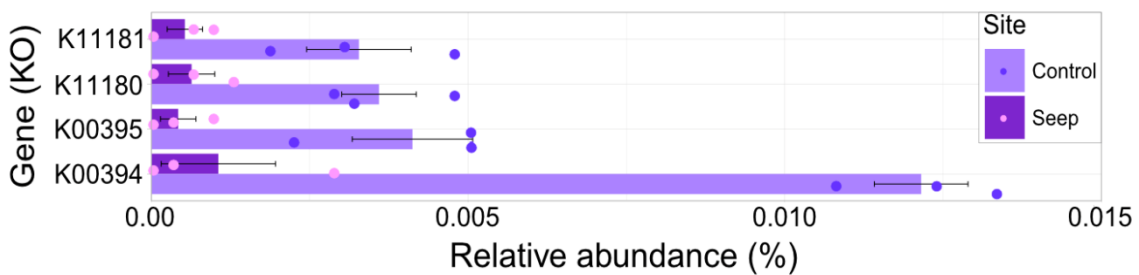

**Supplementary Figure 15. Functions involved in dissimilatory sulfide assimilation in *C. singaporensis*.** Mean ( $n = 3 \pm \text{s.e.m}$ ) relative abundance calculated on rarefied counts and expressed as a percentage. Source data are provided as a Source Data file.

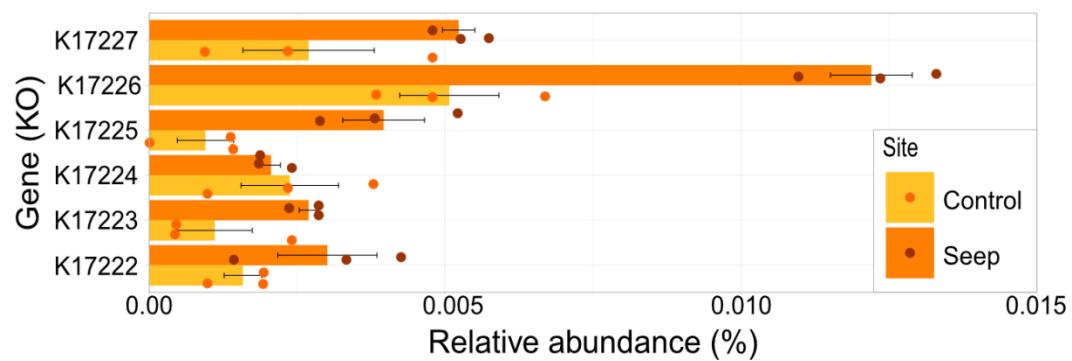

**Supplementary Figure 16. Functions involved sulfate oxidation in *S. flabelliformis*.** Mean ( $n = 3 \pm \text{s.e.m}$ ) relative abundance calculated on rarefied counts and expressed as a percentage. Source data are provided as a Source Data file.

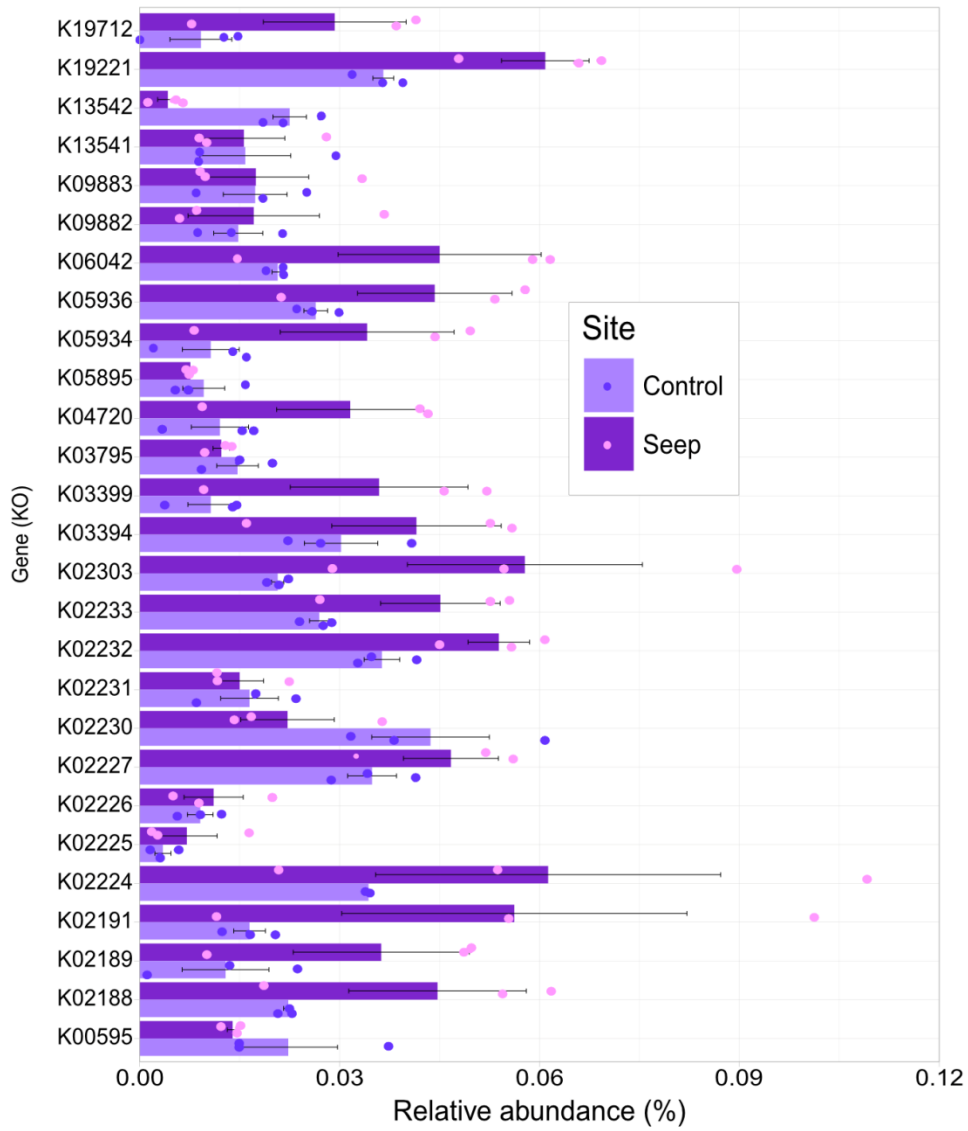

**Supplementary Figure 17. Functions involved in cobalamin biosynthesis in *C. singaporensis*.** Mean ( $n = 3 \pm$  s.e.m) relative abundance calculated on rarefied counts and expressed as a percentage. Source data are provided as a Source Data file.

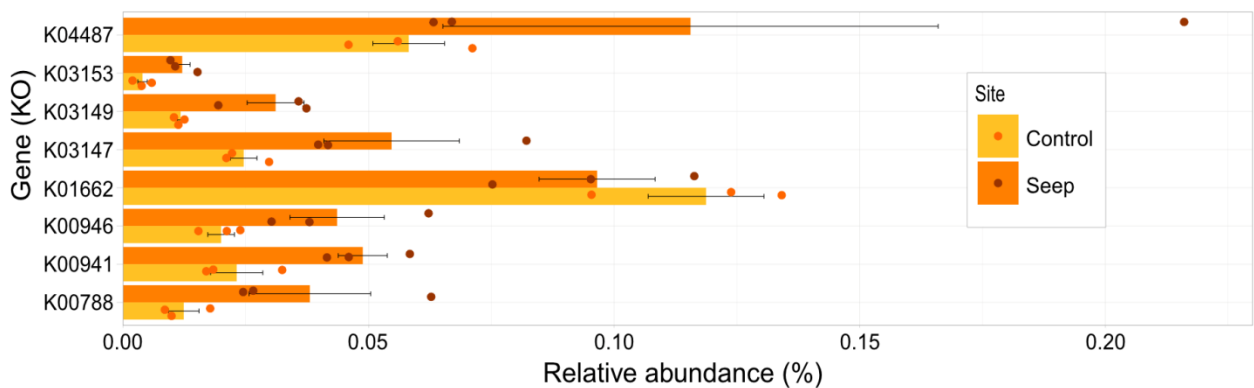

**Supplementary Figure 18. Functions involved in thiamin biosynthesis in *S. flabelliformis*.** Mean ( $n = 3 \pm$  s.e.m) relative abundance calculated on rarefied counts and expressed as a percentage. Source data are provided as a Source Data file.

## Supplementary Tables

**Supplementary Table 1.** Number of genes (KOs) significantly enriched at the control or seep site for each of the three sponge species. Values expressed as percentage of total statistically significantly enriched genes (ANOVA) are shown in parentheses.

|                                                 | <i>C. singaporensis</i> | <i>S. flabelliformis</i> | <i>C. australiensis</i> |
|-------------------------------------------------|-------------------------|--------------------------|-------------------------|
| Number of KO enriched at control ( $p < 0.05$ ) | 1556 (80%)              | 369 (20%)                | 245 (52%)               |
| Number of KO enriched at seep ( $p < 0.05$ )    | 379 (20%)               | 1422 (80%)               | 230 (48%)               |

**Supplementary Table 2.** Statistical output of Permutational Multivariate Analysis of Variance (PERMANOVA) on Bray-Curtis matrix of KOs.

|                | Degrees of freedom | Sum of Square | Mean Square | Pseudo-F | <i>P</i> (perm) | Unique permutations |
|----------------|--------------------|---------------|-------------|----------|-----------------|---------------------|
| Species        | 2                  | 4699          | 2349.5      | 23.267   | 0.0001          | 9940                |
| Site           | 1                  | 244.18        | 244.18      | 2.4181   | 0.0683          | 9957                |
| Species x Site | 2                  | 548.35        | 274.18      | 2.7151   | 0.0237          | 9935                |
| Residuals      | 11                 | 1110.8        | 100.98      |          |                 |                     |
| Total          | 16                 | 6602.3        |             |          |                 |                     |

**Supplementary Table 3.** Summary statistics of environmental variables related to temperature (Temp), salinity, chlorophyll A (Chl a), phaeophytin (Phaeo) and total Nitrogen (TN).

|                 | Temp (°C) | Salinity (ppt) | Chl A ( $\mu\text{g}\cdot\text{L}^{-1}$ ) | Phaeo ( $\mu\text{g}\cdot\text{L}^{-1}$ ) | TN ( $\mu\text{g}\cdot\text{L}^{-1}$ ) |
|-----------------|-----------|----------------|-------------------------------------------|-------------------------------------------|----------------------------------------|
| Avg. C          | 28.69     | 35.01          | 0.243                                     | 0.177                                     | 14.82                                  |
| Med. C          | 29.06     | 34.80          | 0.230                                     | 0.175                                     | 14.48                                  |
| SD C            | 1.37      | 0.63           | 0.089                                     | 0.018                                     | 3.72                                   |
| Min C           | 26.09     | 33.20          | 0.143                                     | 0.159                                     | 10.30                                  |
| Max C           | 31.47     | 36.00          | 0.388                                     | 0.197                                     | 19.90                                  |
| Avg. S          | 28.82     | 34.77          | 0.190                                     | 0.165                                     | 15.32                                  |
| Med. S          | 29.15     | 34.80          | 0.195                                     | 0.179                                     | 14.93                                  |
| SD S            | 1.38      | 0.54           | 0.014                                     | 0.030                                     | 0.94                                   |
| Min S           | 26.16     | 32.20          | 0.168                                     | 0.120                                     | 14.37                                  |
| Max S           | 31.51     | 36.00          | 0.205                                     | 0.191                                     | 16.73                                  |
| t-test df       | 1515.8    | 162.01         | 17.996                                    | 10.89                                     | 13.057                                 |
| t-test <i>p</i> | 0.068     | 1.7e-4         | 0.247                                     | 0.623                                     | 0.699                                  |
| Time range      | Mar-14    | Apr-14         | Jan-13                                    | Jan-13                                    | Jan-13                                 |

Avg: Average, Med: Median, SD: standard deviation, Min: Minimum, Max: Maximum, t-test df: t-test degree of freedom, t-test *p*: t-test *p*-value, C: control, S: seep

**Supplementary Table 4.** Summary statistics of environmental variables related to carbon: Total Organic Carbon (TOC), pH, Total Aragonite (TA), CO<sub>2</sub> partial pressure (pCO<sub>2</sub>), bicarbonate (HCO<sub>3</sub><sup>-</sup>), carbonate (CO<sub>3</sub><sup>2-</sup>), carbon dioxide (CO<sub>2</sub>) Dissolved Inorganic Carbon (DIC).

|                 | TOC<br>( $\mu\text{g.L}^{-1}$ ) | pH                        | TA<br>( $\mu\text{mol.Kg}^{-1}$ ) | pCO <sub>2</sub><br>( $\mu\text{atm}$ ) | HCO <sub>3</sub> <sup>-</sup><br>( $\mu\text{mol.kg}^{-1}$ ) | CO <sub>3</sub> <sup>2-</sup><br>( $\mu\text{mol.Kg}^{-1}$ ) | CO <sub>2</sub><br>( $\mu\text{mol.kg}^{-1}$ ) | DIC<br>( $\mu\text{mol.kg}^{-1}$ ) |
|-----------------|---------------------------------|---------------------------|-----------------------------------|-----------------------------------------|--------------------------------------------------------------|--------------------------------------------------------------|------------------------------------------------|------------------------------------|
| Avg. C          | 93.62                           | 8.01                      | 2264                              | 369.7                                   | 1661                                                         | 243.0                                                        | 9.426                                          | 1913                               |
| Med. C          | 94.87                           | 8.01                      | 2254                              | 351.7                                   | 1660                                                         | 246.5                                                        | 9.133                                          | 1924                               |
| SD C            | 16.90                           | 0.06                      | 33                                | 55.7                                    | 45                                                           | 24.6                                                         | 1.380                                          | 28                                 |
| Min C           | 70.65                           | 7.88                      | 2202                              | 296.5                                   | 1574                                                         | 187.9                                                        | 7.654                                          | 1844                               |
| Max C           | 115.09                          | 8.09                      | 2340                              | 540.3                                   | 1761                                                         | 281.6                                                        | 13.593                                         | 1987                               |
| Avg. S          | 110.08                          | 7.76                      | 2305                              | 827.4                                   | 1887                                                         | 168.8                                                        | 21.178                                         | 2077                               |
| Med. S          | 103.83                          | 7.82                      | 2305                              | 615.6                                   | 1857                                                         | 177.0                                                        | 15.533                                         | 2049                               |
| SD S            | 31.55                           | 0.20                      | 49                                | 713.9                                   | 140                                                          | 44.5                                                         | 17.940                                         | 114                                |
| Min S           | 81.72                           | 6.98                      | 2180                              | 328.4                                   | 1679                                                         | 29.6                                                         | 8.905                                          | 1915                               |
| Max S           | 161.81                          | 8.02                      | 2541                              | 6314.6                                  | 2365                                                         | 249.3                                                        | 158.077                                        | 2552                               |
| t-test df       | 12.618                          | 271.5                     | 155.03                            | 215.27                                  | 271.88                                                       | 198.23                                                       | 214.99                                         | 264.11                             |
| t-test <i>p</i> | 0.246                           | 2.2e-16                   | 5.9e-13                           | < 2.2e-16                               | < 2.2e-16                                                    | < 2.2e-16                                                    | 2.2e-16                                        | < 2.2e-16                          |
| Time range      | Jan-2013                        | Dec-2011<br>-<br>Apr-2014 | Dec-2011<br>-<br>Apr-2014         | Dec-2011<br>-<br>Apr-2014               | Dec-2011<br>-<br>Apr-2014                                    | Dec-2011<br>-<br>Apr-2014                                    | Dec-2011<br>-<br>Apr-2014                      | Dec-2011<br>-<br>Apr-2014          |

Avg: Average, Med: Median, , SD: standard deviation, Min: Minimum, Max: Maximum, t-test df: t-test degree of freedom, t-test *p*: t-test *p*-value, C: control, S: seep

**Supplementary Table 5.** Summary statistics of environmental variables related to ions and trace elements: Calcium (Ca), Barium (Ba), Chloride (Cl), Potassium (K), Magnesium (Mg), Sodium (Na), Sulfur (S) and Strontium (Sr).

|                 | Ca<br>( $\text{mg.L}^{-1}$ ) | Ba<br>( $\text{mg.L}^{-1}$ ) | Cl<br>( $\text{mg.L}^{-1}$ ) | K<br>( $\text{mg.L}^{-1}$ ) | Mg<br>( $\text{mg.L}^{-1}$ ) | Na<br>( $\text{mg.L}^{-1}$ ) | S<br>( $\text{mg.L}^{-1}$ ) | Sr<br>( $\text{mg.L}^{-1}$ ) |
|-----------------|------------------------------|------------------------------|------------------------------|-----------------------------|------------------------------|------------------------------|-----------------------------|------------------------------|
| Avg. C          | 421.7                        | 0.0018                       | 21739                        | 365.7                       | 1369                         | 10182                        | 902.5                       | 8.60                         |
| Med. C          | 421.0                        | 0.0020                       | 22428                        | 365.0                       | 1367                         | 10151                        | 901                         | 8.58                         |
| SD C            | 3.4                          | 0.0005                       | 2012                         | 1.8                         | 11                           | 79                           | 3.885872                    | 0.06                         |
| Min C           | 419.0                        | 0.0010                       | 18115                        | 364.0                       | 1361                         | 10126                        | 899                         | 8.54                         |
| Max C           | 428.0                        | 0.0020                       | 23943                        | 369.0                       | 1390                         | 10339                        | 910                         | 8.71                         |
| Avg. S          | 420.8                        | 0.0023                       | 21934                        | 364.9                       | 1364                         | 10147                        | 899.9414                    | 8.62                         |
| Med. S          | 421.0                        | 0.0018                       | 21755                        | 364.8                       | 1364                         | 10153                        | 899.6141                    | 8.61                         |
| SD S            | 2.3                          | 0.0019                       | 1654                         | 1.7                         | 7                            | 58                           | 3.193955                    | 0.07                         |
| Min S           | 0.0097                       | 0.0007                       | 18353                        | 361.9                       | 1352                         | 10059                        | 894.721                     | 8.50                         |
| Max S           | 0.0100                       | 0.0106                       | 25693                        | 370.1                       | 1380                         | 10263                        | 907.1617                    | 8.80                         |
| t-test df       | 5.9433                       | 18.974                       | 6.4222                       | 6.9111                      | 5.9972                       | 6.119                        | 6.4222                      | 8.4419                       |
| t-test <i>p</i> | 0.556                        | 0.214                        | 0.830                        | 0.374                       | 0.305                        | 0.350                        | 0.178                       | 0.446                        |
| Time range      | Aug-2010                     | Aug-2010                     | Aug-2010                     | Aug-2010                    | Aug-2010                     | Aug-2010                     | Aug-2010                    | Aug-2010                     |

Avg: Average, Med: Median, , SD: standard deviation, Min: Minimum, Max: Maximum, t-test df: t-test degree of freedom, t-test *p*: t-test *p*-value, C: control, S: seep

**Supplementary Table 6.** Canonical eigenvectors on averages of: carbon dioxide (CO<sub>2</sub>), CO<sub>2</sub> partial pressure (pCO<sub>2</sub>), carbonate (CO<sub>3</sub><sup>2-</sup>), Barrium (Ba), chlorophyll A (Chl a), Total Organic Carbon (TOC), bicarbonate (HCO<sub>3</sub><sup>-</sup>), Dissolved Inorganic Carbon (DIC), phaeophytin (Phaeo), Total Nitrogen (TN), pH, Total Aragonite (TA), Chloride (Cl), Salinity, Temperature (Temp), Magnesium (Mg), Sodium (Na), Calcium (Ca), Sulfur (S) and Strontium (Sr).

| Variable                                               | CAP1   | CAP2   |
|--------------------------------------------------------|--------|--------|
| Temp (°C)                                              | -0.005 | 0.322  |
| Salinity (ppt)                                         | 0.008  | 0      |
| Chl a (µg.L <sup>-1</sup> )                            | 0.235  | -0.255 |
| Phaeo (µg.L <sup>-1</sup> )                            | 0.075  | 0.291  |
| TOC (µg.L <sup>-1</sup> )                              | -0.163 | -0.397 |
| TN (µg.L <sup>-1</sup> )                               | -0.036 | 0      |
| pH                                                     | 0.034  | 0.191  |
| TA (µmoles.Kg <sup>-1</sup> )                          | -0.02  | -0.05  |
| pCO <sub>2</sub> (µatm)                                | -0.594 | -0.349 |
| HCO <sub>3</sub> (µmol.kg <sup>-1</sup> )              | -0.129 | 0.041  |
| CO <sub>3</sub> <sup>2-</sup> (µmol.kg <sup>-1</sup> ) | 0.327  | -0.644 |
| CO <sub>2</sub> (µmol.kg <sup>-1</sup> )               | -0.596 | 0.011  |
| DIC (µmol.kg <sup>-1</sup> )                           | -0.086 | -0.062 |
| Ba (mg.L <sup>-1</sup> )                               | -0.266 | 0.085  |
| Cl (mg.L <sup>-1</sup> )                               | -0.01  | 0.017  |
| Mg (mg.L <sup>-1</sup> )                               | 0.004  | 0.011  |
| Na (mg.L <sup>-1</sup> )                               | 0.004  | 0.007  |
| S (mg.L <sup>-1</sup> )                                | 0.003  | 0.009  |
| Sr (mg.L <sup>-1</sup> )                               | -0.003 | -0.003 |
| Ca (mg.L <sup>-1</sup> )                               | 0.002  | 0.007  |
| K (mg.L <sup>-1</sup> )                                | 0.002  | 0.006  |

**Supplementary Table 7.** Taxonomy of scaffolds carrying genes encoding HP/HB cycle enzymes, as a percentage of the total number of such scaffolds, for each gene.

|               | <b>Gene</b>                                                                               | <b>Major taxa</b>               | <b>Average at control (%)<br/>± SD</b> | <b>Average at seep (%)<br/>± SD</b> |
|---------------|-------------------------------------------------------------------------------------------|---------------------------------|----------------------------------------|-------------------------------------|
| <b>K18603</b> | Acetyl-CoA/propionyl-CoA carboxylase [EC:6.4.1.2 6.4.1.3]                                 | <i>Nitrosopumilus</i>           | 100                                    | 100                                 |
| <b>K18604</b> | Acetyl-CoA/propionyl-CoA carboxylase [EC:6.4.1.2 6.4.1.3]                                 | <i>Nitrosopumilus</i>           | 80 (± 17)                              | 96 (± 4)                            |
| <b>K18605</b> | Acetyl-CoA/propionyl-CoA carboxylase [EC:6.4.1.2 6.4.1.3]                                 | <i>Nitrosopumilus</i>           | 100                                    | 75 (± 15)                           |
| <b>K18602</b> | Malonic semialdehyde reductase [EC:1.1.1.-]                                               | <i>Nitrosopumilus</i>           | 75 (± 43),<br>100% Thaumarchaeota      | 95 (± 8)                            |
| <b>K18594</b> | 3-hydroxypropionyl-CoA synthetase (ADP-forming) [EC:6.2.1.-]                              | <i>Nitrosopumilus maritimus</i> | 79 (± 11),<br>90% Thaumarchaeota       | 98 (± 2)                            |
| K01715        | Crotonase, enoyl-CoA hydratase                                                            | Bacteria and unclassified       | 100                                    | 97 (± 3)                            |
| <b>K15019</b> | 3-hydroxypropionyl-coenzyme A dehydratase [EC:4.2.1.116] and crotonyl-CoA hydratase       | <i>Nitrosopumilus</i>           | 72 (± 13)                              | 100                                 |
| K19745        | Acryloyl-CoA reductase                                                                    | Bacteria and unclassified       | 100                                    | 100                                 |
| K15052        | Propionyl-CoA carboxylase [EC:6.4.1.3]                                                    | Bacteria and unclassified       | 100                                    | 100                                 |
| <b>K05606</b> | Methylmalonyl-CoA epimerase                                                               | Thaumarchaeota                  | 20 (± 16)                              | 58 (± 33)                           |
| <b>K01848</b> | Methylmalonyl-CoA mutase [EC:5.4.99.2] (MUT)                                              | Thaumarchaeota                  | 37 (± 28)                              | 79 (± 1)                            |
| <b>K01849</b> | Methylmalonyl-CoA mutase [EC:5.4.99.2] (MUT)                                              | Thaumarchaeota                  | 48 (± 31)                              | 63 (± 52)                           |
| <b>K18593</b> | 4-hydroxybutyryl-CoA synthetase (ADP-forming) [EC:6.2.1.-]                                | <i>Nitrosopumilus</i>           | 97 (± 5)                               | 100 (± 1)                           |
| <b>K14534</b> | 4-hydroxybutyryl-CoA dehydratase / vinylacetyl-CoA-Delta-isomerase [EC:4.2.1.120 5.3.3.3] | <i>Nitrosopumilus</i>           | 79 (± 11)                              | 99 (± 1)                            |
| <b>K15016</b> | 3-hydroxybutyryl-CoA dehydrogenase [EC:4.2.1.17 1.1.1.35]                                 | <i>Nitrosopumilus</i>           | 71 (± 20)                              | 69 (± 14)                           |
| <b>K00626</b> | Acetyl-CoA acetyltransferase                                                              | Bacteria and Archaea            | 70.1 (± 5) and 11.9 (± 7)              | 48 (± 17) and 38.5 (± 24)           |

Bold indicates KOs used in Figure3.

**Supplementary Table 8.** Taxonomy of *C. singaporensis* scaffolds carrying genes for creatine, creatinine and arginine catabolism, and ammonium utilisation as a percentage of the total number of such scaffolds, for each gene.

|        | Gene                         | Average bacteria in control (%) | Average bacteria in seep (%) | Average archaea in control (%) | Average archaea in seep (%) |
|--------|------------------------------|---------------------------------|------------------------------|--------------------------------|-----------------------------|
| K01485 | Cytosine deaminase           | 81 (± 4)                        | 91 (± 9)                     | 0                              | 0                           |
| K01473 | N-methylhydantoinase (hyuA)  | 79 (± 10)                       | 73 (± 19)                    | 0                              | 0                           |
| K01474 | N-methylhydantoinase (hyuB)  | 79 (± 8)                        | 71 (± 11)                    | 1 (± 1)                        | 0                           |
| K08687 | N-carbamoylsarcosine amidase | 83 (± 29)                       | 0                            | 0                              | 0                           |
| K08688 | Creatinase                   | 78 (± 20)                       | 70 (± 39)                    | 0                              | 0                           |
| K01430 | UreA (Urease subunit)        | 34 (± 32)                       | 15 (± 6)                     | 62 (± 39)                      | 85 (± 6)                    |
| K01429 | UreB (Urease subunit)        | 43 (± 39)                       | 15 (± 3)                     | 57 (± 39)                      | 84 (± 4)                    |
| K01428 | UreC (Urease subunit)        | 49 (± 31)                       | 21 (± 11)                    | 47 (± 33)                      | 78 (± 12)                   |
| K03190 | UreD-UreH (Urease subunit)   | 38 (± 27)                       | 16 (± 5)                     | 53 (± 24)                      | 84 (± 5)                    |
| K03187 | UreE (Urease subunit)        | 36 (± 32)                       | 13 (± 1)                     | 60 (± 40)                      | 86 (± 1)                    |
| K03188 | UreF (Urease subunit)        | 42 (± 34)                       | 14 (± 3)                     | 56 (± 35)                      | 86 (± 3)                    |
| K03189 | UreG (Urease subunit)        | 43 (± 35)                       | 13 (± 2)                     | 55 (± 34)                      | 87 (± 2)                    |
| K03192 | UreJ (Urease subunit)        | 97 (± 8)                        | 100                          | 0                              | 0                           |
| K03191 | UreI (Urea transport)        | 67 (± 57)                       | 100                          | 0                              | 0                           |
| K11959 | UrtA (Urea transport)        | 97 (± 2)                        | 81 (± 32)                    | 0                              | 0                           |
| K11960 | UrtB (Urea transport)        | 99 (± 2)                        | 97 (± 5)                     | 0                              | 0                           |
| K11961 | UrtC (Urea transport)        | 92 (± 7)                        | 83 (± 29)                    | 0                              | 0                           |
| K11962 | UrtD (Urea transport)        | 85 (± 13)                       | 85 (± 25)                    | 0                              | 0                           |
| K11963 | UrtE (Urea transport)        | 82 (± 15)                       | 93 (± 12)                    | 0                              | 0                           |
| K01480 | Agmatinase                   | 62 (± 18)                       | 48 (± 15)                    | 26 (± 16)                      | 41 (± 20)                   |
| K01585 | Arginine decarboxylase       | 95 (± 9)                        | 94 (± 11)                    | 0                              | 0                           |
| K02626 | Arginine decarboxylase       | 11 (± 6)                        | 4 (± 4)                      | 62 (± 38)                      | 98 (± 3)                    |
| K01915 | Glutamine synthetase         | 75 (± 2)                        | 57 (± 8)                     | 12 (± 8)                       | 30 (± 18)                   |
| K10944 | AmoA                         | 13 (± 18)                       | 0 (± 1)                      | 87 (± 18)                      | 100 (± 1)                   |
| K10945 | AmoB                         | 7 (± 6)                         | 0                            | 74 (± 23)                      | 100                         |
| K10946 | AmoC                         | 9 (± 4)                         | 0                            | 75 (± 20)                      | 100                         |



**Supplementary Table 9.** Taxonomy of *C. singaporensis* scaffolds carrying genes for arginine biosynthesis as a percentage of the total number of such scaffolds, for each gene.

|        | Gene             | Average bacteria in control (%) | Average bacteria in seep (%) | Average archaea in control (%) | Average archaea in seep (%) |
|--------|------------------|---------------------------------|------------------------------|--------------------------------|-----------------------------|
| K00619 | <i>argA</i>      | 35 (± 11)                       | 3 (± 4)                      | 63 (± 10)                      | 96 (± 3)                    |
| K14682 | <i>argAB</i>     | 93 (± 9)                        | 82 (± 15)                    | 0                              | 0                           |
| K00620 | <i>argJ</i>      | 86 (± 8)                        | 78 (± 5)                     | 0                              | 0                           |
| K00930 | <i>argB</i>      | 87 (± 12)                       | 89 (± 7)                     | 0                              | 0                           |
| K00145 | <i>argC</i>      | 81 (± 7)                        | 82 (± 4)                     | 0                              | 0                           |
| K00818 | <i>argD</i>      | 82 (± 27)                       | 90 (± 12)                    | 0                              | 0                           |
| K00821 | <i>argD</i>      | 83 (± 22)                       | 80 (± 16)                    | 0                              | 0                           |
| K01438 | <i>argE</i>      | 82 (± 14)                       | 71 (± 24)                    | 0                              | 1                           |
| K05826 | <i>LysW</i>      | 26 (± 16)                       | 6 (± 9)                      | 74 (± 16)                      | 94 (± 9)                    |
| K05827 | <i>LysX-argX</i> | 35 (± 25)                       | 3 (± 2)                      | 58 (± 30)                      | 96 (± 1)                    |
| K05828 | <i>LysZ</i>      | 31 (± 25)                       | 0                            | 68 (± 25)                      | 100                         |
| K05829 | <i>LysY</i>      | 44 (± 28)                       | 3 (± 1)                      | 54 (± 25)                      | 96 (± 1)                    |
| K05830 | <i>LysJ</i>      | 41 (± 30)                       | 1 (± 1)                      | 52 (± 28)                      | 99 (± 1)                    |
| K05831 | <i>LysK</i>      | 22 (± 19)                       | 2 (± 2)                      | 75 (± 16)                      | 96 (± 2)                    |

**Supplementary Table 10.** Key features of the *lysX/argX* gene (K05827) from *C. singaporensis* samples.

| Sample | Site    | Scaffold ID                            | Gene ID             | Identity of residues 259-260 on <i>lysX/argX</i> | Species (IMG-assigned)                     |
|--------|---------|----------------------------------------|---------------------|--------------------------------------------------|--------------------------------------------|
| co6ic  | Control | 3300021558 assembled Ga0224704_1093963 | Ga0224704_10939635  | Gly-Phe                                          | <i>Candidatus Nitrosopumilus sediminis</i> |
| co6ic  | Control | 3300021558 assembled Ga0224704_1126348 | Ga0224704_112634814 | Gly-Phe                                          | <i>Nitrosopumilus maritimus</i>            |
| co6ic  | Control | 3300021558 assembled Ga0224704_1156405 | Ga0224704_11564052  | Asn-Thr                                          | <i>Nitrosopumilus maritimus</i>            |
| co14ic | Control | 3300021557 assembled Ga0224710_1181710 | Ga0224710_11817102  | Asn-Thr                                          | <i>Nitrosopumilus maritimus</i>            |
| co15ic | Control | 3300021552 assembled Ga0224709_1066020 | Ga0224709_10660203  | Asn-Thr                                          | <i>Nitrosopumilus maritimus</i>            |
| co15ic | Control | 3300021552 assembled Ga0224709_1088276 | Ga0224709_10882767  | Gly-Lys                                          | <i>Candidatus Nitrosopumilus sediminis</i> |
| co15ic | Control | 3300021552 assembled Ga0224709_1089456 | Ga0224709_10894561  | Gly-Lys                                          | <i>Nitrosopumilus maritimus</i>            |
| co15ic | Control | 3300021552 assembled Ga0224709_1089456 | Ga0224709_10894568  | Asn-Thr                                          | <i>Nitrosopumilus maritimus</i>            |
| co35is | Seep    | 3300021549 assembled Ga0224705_1076848 | Ga0224705_10768481  | Gly-Lys                                          | <i>Nitrosopumilus maritimus</i>            |
| co35is | Seep    | 3300021549 assembled Ga0224705_1076848 | Ga0224705_107684818 | Asn-Thr                                          | <i>Nitrosopumilus maritimus</i>            |
| co35is | Seep    | 3300021549 assembled Ga0224705_1096918 | Ga0224705_10969181  | Gly-Lys                                          | <i>Nitrosopumilus species</i>              |
| co46is | Seep    | 3300021545 assembled Ga0224706_1081283 | Ga0224706_108128310 | Gly-Lys                                          | <i>Nitrosopumilus maritimus</i>            |
| co46is | Seep    | 3300021545 assembled Ga0224706_1081283 | Ga0224706_108128317 | Asn-Thr                                          | <i>Nitrosopumilus maritimus</i>            |
| co52is | Seep    | 3300021544 assembled Ga0224707_111780  | Ga0224707_11178010  | Asn-Thr                                          | <i>Nitrosopumilus maritimus</i>            |
| co52is | Seep    | 3300021544 assembled Ga0224707_111780  | Ga0224707_11178017  | Gly-Lys                                          | <i>Nitrosopumilus maritimus</i>            |

**Supplementary Table 11.** Taxonomy of *S. flabelliformis* scaffolds carrying genes for creatine and creatinine catabolism and ammonium utilisation, as a percentage of the total number of such scaffolds, for each gene.

|        | Gene                        | Average bacteria in control (%) | Average bacteria in seep (%) | Average archaea in control (%) | Average archaea in seep (%) |
|--------|-----------------------------|---------------------------------|------------------------------|--------------------------------|-----------------------------|
| K01485 | Cytosine deaminase          | 100                             | 92 (± 14)                    | 0                              | 0                           |
| K01473 | N-methylhydantoinase (hyuA) | 92 (± 7)                        | 85 (± 9)                     | 3 (± 5)                        | 3 (± 5)                     |
| K01474 | N-methylhydantoinase (hyuB) | 98 (± 4)                        | 96 (± 3)                     | 0                              | 0                           |
| K08688 | Creatinase                  | 94 (± 9)                        | 76 (± 14)                    | 0                              | 0                           |
| K01430 | UreA (Urea transport)       | 100                             | 89 (± 16)                    | 0                              | 0                           |
| K01429 | UreB (Urea transport)       | 80 (± 34)                       | 75 (± 15)                    | 0                              | 0                           |
| K01428 | UreC (Urea transport)       | 90 (± 11)                       | 92 (± 9)                     | 0                              | 0                           |
| K03190 | UreD-UreH (Urea transport)  | 89 (± 7)                        | 55 (± 8)                     | 0                              | 1 (± 2)                     |
| K03187 | UreE (Urea transport)       | 100                             | 99 (± 1)                     | 0                              | 0                           |
| K03188 | UreF (Urea transport)       | 98 (± 2)                        | 90 (± 9)                     | 0                              | 0                           |
| K03189 | UreG (Urea transport)       | 83 (± 27)                       | 84 (± 14)                    | 0                              | 0                           |
| K03192 | UreJ (Urea transport)       | 100                             | 100                          | 0                              | 0                           |
| K01915 | Glutamine synthetase        | 87 (± 2)                        | 80 (± 15)                    | 4 (± 4)                        | 12 (± 16)                   |
| K00265 | Glutamate synthase          | 99 (± 1)                        | 87 (± 9)                     | 0                              | 0                           |
| K00266 | Glutamate synthase          | 79 (± 6)                        | 89 (± 3)                     | 0                              | 0                           |

**Supplementary Table 12.** Taxonomy of *S. flabelliformis* scaffolds carrying genes for taurine degradation, sulfide production and assimilation, as a percentage of the total number of such scaffolds, for each gene.

|        | Gene                                | Major taxa                      | Average at control (%)        | Average at seep (%) |
|--------|-------------------------------------|---------------------------------|-------------------------------|---------------------|
| K03851 | Taurine pyruvate amino transferase  | Thiotrichales                   | 41% (± 6)                     | 50 (± 16)           |
| K03852 | Sulfoacetaldehyde acetyltransferase | Burkholderiales                 | 33 (± 4)                      | 10 (± 8)            |
| K00381 | Sulfite reductase                   | Methylcoccales                  | 35 (± 9)                      | 9.5 (± 8.3)         |
| K00651 | Homoserine O-succinyl-transferase   | Chromatiales<br>Methylococcales | 31.8 (± 8.3)<br>38.9 (± 14.2) | 3.8 (± 6.4)<br>0    |
| K01739 | Cystathionine gamma-synthase        | Myxococcales                    | 73 (+- 4)                     | 47 (+- 8)           |
| K01760 | Cystathionine-β-lyase               | Myxococcales                    | 78 (± 8)                      | 48 (± 34)           |
| K10764 | O-succinyl-homoserine sulfydrylase  | Oceanospirillales               | 28.8 (± 14)                   | 6.2 (± 7)           |

**Supplementary Table 13.** Taxonomy of *C. singaporensis* scaffolds carrying genes involved in sulfate reduction as percentage of the total number of such scaffolds, for each gene.

|        | Gene        | Major taxa                                             | Average at control (%)             | Average at seep (%)                |
|--------|-------------|--------------------------------------------------------|------------------------------------|------------------------------------|
| K00394 | <i>aprA</i> | Archaeoglobales<br>Chromatiales<br>Gammaproteobacteria | 6<br>4<br>10                       | 75<br>25<br>0                      |
| K00395 | <i>aprB</i> | Chromatiales<br>Gammaproteobacteria                    | 50<br>23                           | 100<br>0                           |
| K11180 | <i>dsrA</i> | Chromatiales                                           | 70 (± 53)<br>(100% Proteobacteria) | 44 (± 51),<br>Absent in one sample |
| K11181 | <i>dsrB</i> | Gammaproteobacteria                                    | 81 (± 16)                          | 67 (± 58)<br>Absent in one sample  |

**Supplementary Table 14.** Taxonomy of *S. flabelliformis* scaffolds carrying genes involved in sulfate reduction as percentage of the total number of such scaffolds, for each gene.

|        | Gene | Major taxa                                  | Average at control (%) | Average at seep (%) |
|--------|------|---------------------------------------------|------------------------|---------------------|
| K17222 | soxA | Gammaproteobacteria                         | 66.7 (± 57.7)          | 100                 |
| K17223 | soxX | Gammaproteobacteria and/or unclassified     | 90 (± 17.3)            | 100                 |
| K17224 | soxB | Gammaproteobacteria                         | 88 (± 22.4)            | 100                 |
| K17225 | soxC | Gammaproteobacteria and Alphaproteobacteria | 100                    | 100                 |
| K17226 | soxY | Gammaproteobacteria                         | 65 (± 11)              | 63 (± 17)           |
| K17227 | soxZ | Gammaproteobacteria and/or unclassified     | 100                    | 100                 |

**Supplementary Table 15.** Results of ANOVA testing the effects of site and oxygen condition on the relative abundance of genes involved in the synthesis of cobalamin in the *C. singaporensis* microbiome.

|                         | Df | Sum of Squares | Mean Square | F value | P-value |
|-------------------------|----|----------------|-------------|---------|---------|
| Site                    | 1  | 0.21451        | 0.21451     | 6.897   | 0.0304  |
| Oxygen condition        | 1  | 0.02824        | 0.02824     | 0.908   | 0.3685  |
| Site x Oxygen condition | 1  | 0.01791        | 0.01791     | 0.576   | 0.4697  |
| Residuals               | 8  | 0.24881        | 0.03110     |         |         |

**Supplementary Table 16.** Taxonomy of scaffolds carrying genes for cobalamin biosynthesis, as a percentage of the total number of such scaffolds, for each type of pathway.

| Pathway   | Major phyla    | Average at control (%) ± stdev | Average at seep (%) |
|-----------|----------------|--------------------------------|---------------------|
| Aerobic   | Cyanobacteria  | 8 (± 7)                        | 7 (± 6)             |
|           | Proteobacteria | 13 (± 10)                      | 14 (± 19)           |
|           | Thaumarchaeota | 19 (± 15)                      | 26 (± 15)           |
| Anaerobic | Cyanobacteria  | 8 (± 6)                        | 6 (± 6)             |
|           | Proteobacteria | 10 (± 9)                       | 9 (± 15)            |
|           | Thaumarchaeota | 19 (± 15)                      | 26 (± 16)           |

**Supplementary Table 17.** Taxonomy of scaffolds carrying the genes for thiamin biosynthesis with differences between sites, expressed as a percentage of the total number of such scaffolds, for each gene.

|        | Gene        | Major taxa     | Average at control (%) | Average at seep (%) |
|--------|-------------|----------------|------------------------|---------------------|
| K03147 | <i>ThiC</i> | Proteobacteria | 19 (± 4)               | 15 (± 10)           |
|        |             | Thaumarchaeota | 39 (± 13)              | 31 (± 37)           |
| K00941 | <i>ThiD</i> | Proteobacteria | 36 (± 18)              | 57 (± 25)           |
|        |             | Thaumarchaeota | 51 (± 10)              | 29 (± 32)           |
| K00788 | <i>ThiE</i> | Proteobacteria | 50 (± 12)              | 37 (± 15)           |
| K00946 | <i>ThiL</i> | Proteobacteria | 44 (± 24)              | 65 (± 30)           |
|        |             | Thaumarchaeota | 41 (± 18)              | 27 (± 31)           |
| K03153 | <i>ThiO</i> | Cyanobacteria  | 21 (± 13)              | 14 (± 1)            |
|        |             | Proteobacteria | 79 (± 13)              | 90 (± 9)            |
| K03149 | <i>ThiG</i> | Proteobacteria | 68 (± 30)              | 60 (± 16)           |
| K01662 | <i>Dxs</i>  | Proteobacteria | 85 (± 5)               | 69 (± 12)           |
| K04487 | <i>IscS</i> | Actinobacteria | 18 (± 7)               | 7 (± 11)            |
|        |             | Proteobacteria | 21 (± 15)              | 21 (± 12)           |
|        |             | Thaumarchaeota | 14 (± 5)               | 7 (± 6)             |

**Supplementary Table 18.** Statistics of sequence processing.

| Sample ID | Species and Site                   | Number of raw reads | Number of reads after quality trimming | Input mean length (bp) | Number of contigs after assembly | % of Eukaryotic contamination (removed) | % of reads mapped to assembly |
|-----------|------------------------------------|---------------------|----------------------------------------|------------------------|----------------------------------|-----------------------------------------|-------------------------------|
| co6ic     | <i>C. singaporensis</i> , Control  | 4886130             | 4872020                                | 242.51                 | 192726                           | 3.2                                     | 75.76                         |
| co14ic    | <i>C. singaporensis</i> , Control  | 6711024             | 6699546                                | 238                    | 328680                           | 5.0                                     | 73.91                         |
| co15ic    | <i>C. singaporensis</i> , Control  | 4203192             | 4191894                                | 248.77                 | 163960                           | 1.6                                     | 76.33                         |
| co35is    | <i>C. singaporensis</i> , Seep     | 4093436             | 4085846                                | 256.22                 | 191919                           | 1.5                                     | 67.07                         |
| co46is    | <i>C. singaporensis</i> , Seep     | 4440394             | 4431782                                | 253.02                 | 165209                           | 2.5                                     | 71.33                         |
| co52is    | <i>C. singaporensis</i> , Seep     | 3835628             | 3824370                                | 243.33                 | 136182                           | 2.1                                     | 71.47                         |
| st9ic     | <i>S. flabelliformis</i> , Control | 6369926             | 6348546                                | 243.53                 | 190377                           | 4.1                                     | 66.71                         |
| st32ic    | <i>S. flabelliformis</i> , Control | 5316804             | 5299250                                | 239.7                  | 177493                           | 5.3                                     | 65.16                         |
| st36ic    | <i>S. flabelliformis</i> , Control | 7209704             | 7185022                                | 239.11                 | 281247                           | 8.0                                     | 67.72                         |
| st7is     | <i>S. flabelliformis</i> , Seep    | 5415092             | 5392310                                | 236.96                 | 274471                           | 8.8                                     | 61.76                         |
| st20is    | <i>S. flabelliformis</i> , Seep    | 6460136             | 6438298                                | 243.88                 | 284012                           | 8.8                                     | 67.91                         |
| st43is    | <i>S. flabelliformis</i> , Seep    | 5693478             | 5675070                                | 245.75                 | 255794                           | 8.4                                     | 63                            |
| cg10ic    | <i>C. australiensis</i> , Control  | 5542238             | 5530192                                | 224.32                 | 151120                           | 6.1                                     | 67.87                         |
| cg14ic    | <i>C. australiensis</i> , Control  | 4170450             | 4160532                                | 249.81                 | 100913                           | 2.8                                     | 73.18                         |
| cg17ic    | <i>C. australiensis</i> , Control  | 3467246             | 3454020                                | 238.74                 | 118017                           | 6.6                                     | 58.39                         |
| cg23is    | <i>C. australiensis</i> , Seep     | 3278348             | 3264828                                | 228.72                 | 127317                           | 7.0                                     | 53.33                         |
| cg24is    | <i>C. australiensis</i> , Seep     | 5115336             | 5089038                                | 229.13                 | 132650                           | 5.7                                     | 63.42                         |
| cg27is    | <i>C. australiensis</i> , Seep     | 5490684             | 5456424                                | 211.18                 | 199402                           | 8.9                                     | 55.06                         |
| EBic1     | Water, Control                     | 5169462             | 5153944                                | 244.2                  | 243718                           | 0                                       | 58.62                         |
| wic       | Water, Control                     | 2482988             | 2479080                                | 254.37                 | 93724                            | 0                                       | 45.14                         |
| EBis3     | Water, Seep                        | 6020196             | 6006742                                | 259.05                 | 318552                           | 0                                       | 57.03                         |
| EBis4     | Water, Seep                        | 8719600             | 8693154                                | 250.5                  | 441685                           | 0                                       | 63.19                         |
| wis       | Water, Seep                        | 5783296             | 5769448                                | 267.69                 | 332914                           | 0                                       | 55.60                         |

**Supplementary Table 19.** Accession numbers of data available from NCBI's SRA and IMG/MER.

| Sample ID | Species and Site                   | NCBI SRA Accession (study) | NCBI SRA Bioproject | NCBI SRA Accession (sample) | IMG/MER ID |
|-----------|------------------------------------|----------------------------|---------------------|-----------------------------|------------|
| co6ic     | <i>C. singaporensis</i> , Control  | SRP159543                  | PRJNA488959         | SAMN09946148                | 3300021558 |
| co14ic    | <i>C. singaporensis</i> , Control  | SRP159543                  | PRJNA488959         | SAMN09946149                | 3300021557 |
| co15ic    | <i>C. singaporensis</i> , Control  | SRP159543                  | PRJNA488959         | SAMN09946150                | 3300021552 |
| co35is    | <i>C. singaporensis</i> , Seep     | SRP159543                  | PRJNA488959         | SAMN09946151                | 3300021549 |
| co46is    | <i>C. singaporensis</i> , Seep     | SRP159543                  | PRJNA488959         | SAMN09946152                | 3300021545 |
| co52is    | <i>C. singaporensis</i> , Seep     | SRP159543                  | PRJNA488959         | SAMN09946153                | 3300021544 |
| st9ic     | <i>S. flabelliformis</i> , Control | SRP159543                  | PRJNA488959         | SAMN09946160                | 3300021550 |
| st32ic    | <i>S. flabelliformis</i> , Control | SRP159543                  | PRJNA488959         | SAMN09946161                | 3300021539 |
| st36ic    | <i>S. flabelliformis</i> , Control | SRP159543                  | PRJNA488959         | SAMN09946162                | 3300021556 |
| st7is     | <i>S. flabelliformis</i> , Seep    | SRP159543                  | PRJNA488959         | SAMN09946165                | 3300021554 |
| st20is    | <i>S. flabelliformis</i> , Seep    | SRP159543                  | PRJNA488959         | SAMN09946163                | 3300021555 |
| st43is    | <i>S. flabelliformis</i> , Seep    | SRP159543                  | PRJNA488959         | SAMN09946164                | 3300021551 |
| cg10ic    | <i>C. australiensis</i> , Control  | SRP159543                  | PRJNA488959         | SAMN09946154                | 3300021548 |
| cg14ic    | <i>C. australiensis</i> , Control  | SRP159543                  | PRJNA488959         | SAMN09946155                | 3300021543 |
| cg17ic    | <i>C. australiensis</i> , Control  | SRP159543                  | PRJNA488959         | SAMN09946156                | 3300021542 |
| cg23is    | <i>C. australiensis</i> , Seep     | SRP159543                  | PRJNA488959         | SAMN09946157                | 3300021547 |
| cg24is    | <i>C. australiensis</i> , Seep     | SRP159543                  | PRJNA488959         | SAMN09946158                | 3300021546 |
| cg27is    | <i>C. australiensis</i> , Seep     | SRP159543                  | PRJNA488959         | SAMN09946159                | 3300021553 |
| EBic1     | Water, Control                     | SRP159543                  | PRJNA488959         | SRR7783602                  | 3300007144 |
| wic       | Water, Control                     | SRP159543                  | PRJNA488959         | SRR7783603                  | 3300007041 |
| EBis3     | Water, Seep                        | SRP159543                  | PRJNA488959         | SRR7783604                  | 3300007116 |
| EBis4     | Water, Seep                        | SRP159543                  | PRJNA488959         | SRR7783601                  | 3300007114 |
| wis       | Water, Seep                        | SRP159543                  | PRJNA488959         | SRR7783605                  | 3300007113 |

**Supplementary Table 20.** Origin and properties of MAGs from *C. singaporensis* and *S. flabelliformis*.

| Host                     | Site | Bin ID                        | % Compl. | % Contam. | Quality | GTDB taxonomy                                                                                        |
|--------------------------|------|-------------------------------|----------|-----------|---------|------------------------------------------------------------------------------------------------------|
| <i>C. singaporensis</i>  | C    | metabat_coeloUpaCtrlOnly.1    | 95.44    | 3.6       | 77.44   | d_Bacteria;p_Latescibacteria;c_UBA2968                                                               |
| <i>C. singaporensis</i>  | C    | metabat_coeloUpaCtrlOnly.10   | 73.03    | 1.35      | 66.28   | d_Bacteria;p_Proteobacteria;c_Gammaproteobacteria;o_UBA11654;f_UBA11654                              |
| <i>C. singaporensis</i>  | C    | metabat_coeloUpaCtrlOnly.25   | 91.6     | 1.68      | 83.2    | d_Bacteria;p_Dadabacteria;c_UBA1144                                                                  |
| <i>C. singaporensis</i>  | C    | metabat_coeloUpaCtrlOnly.3    | 89.85    | 5.49      | 62.4    | d_Bacteria;p_Poribacteria;c_WGA-4E;o_WGA-4E;f_WGA-3G;g_WGA-3G                                        |
| <i>C. singaporensis</i>  | C    | metabatSS_coeloUpaCtrlOnly.13 | 75.43    | 1.47      | 68.08   | d_Bacteria;p_Proteobacteria;c_Gammaproteobacteria;o_Pseudomonadales;f_Pseudohongiiellaceae           |
| <i>C. singaporensis</i>  | C    | metabatSS_coeloUpaCtrlOnly.2  | 95.44    | 5.49      | 67.99   | d_Bacteria;p_Poribacteria;c_WGA-4E;o_WGA-4E;f_WGA-3G;g_WGA-3G                                        |
| <i>C. singaporensis</i>  | C    | metabatSS_coeloUpaCtrlOnly.26 | 77.02    | 0.07      | 76.67   | d_Archaea;p_Crenarchaeota;c_Nitrososphaeria;o_Nitrososphaerales;f_Nitrosopumilaceae                  |
| <i>C. singaporensis</i>  | C    | metabatSS_coeloUpaCtrlOnly.7  | 87.91    | 0.99      | 82.96   | d_Bacteria;p_Chloroflexi;c_Dehalococcoidia                                                           |
| <i>C. singaporensis</i>  | C    | metabatVS_coeloUpaCtrlOnly.15 | 93.34    | 0.68      | 89.94   | d_Bacteria;p_Cyanobacteria;c_Oxyphotobacteria;o_Synechococcales_A;f_Cyanobiaceae;g_Synechococcus_B   |
| <i>C. singaporensis</i>  | C    | metabatVS_coeloUpaCtrlOnly.18 | 78.48    | 1.24      | 72.28   | d_Bacteria;p_Proteobacteria;c_Alphaproteobacteria;o_Caulobacteriales;f_Maricaulaceae;g_Oceanicaulis  |
| <i>C. singaporensis</i>  | C    | metabatVS_coeloUpaCtrlOnly.21 | 91.35    | 0.97      | 86.5    | d_Archaea;p_Crenarchaeota;c_Nitrososphaeria;o_Nitrososphaerales;f_Nitrosopumilaceae;g_Nitrosopumilus |
| <i>C. singaporensis</i>  | C    | metabatVS_coeloUpaCtrlOnly.27 | 71.13    | 0.9       | 66.63   | d_Bacteria;p_Proteobacteria;c_Gammaproteobacteria;o_UBA4575;f_UBA4575                                |
| <i>C. singaporensis</i>  | C    | metabatVS_coeloUpaCtrlOnly.8  | 67.32    | 1.43      | 60.17   | d_Bacteria;p_Proteobacteria;c_Alphaproteobacteria;o_Rhodobacterales;f_Rhodobacteraceae;g_Albidovulum |
| <i>C. singaporensis</i>  | S    | metabat_coeloUpaSeepOnly.2    | 77.97    | 0.83      | 73.82   | d_Bacteria;p_Proteobacteria;c_Gammaproteobacteria;o_Pseudomonadales;f_Pseudohongiiellaceae           |
| <i>C. singaporensis</i>  | S    | metabatSS_coeloUpaSeepOnly.3  | 77.76    | 0.27      | 76.41   | d_Bacteria;p_Proteobacteria;c_Gammaproteobacteria;o_Pseudomonadales;f_HTCC2089                       |
| <i>C. singaporensis</i>  | S    | metabatSS_coeloUpaSeepOnly.4  | 92.26    | 0.36      | 90.46   | d_Bacteria;p_Cyanobacteria;c_Oxyphotobacteria;o_Synechococcales_A;f_Cyanobiaceae;g_Synechococcus_B   |
| <i>C. singaporensis</i>  | S    | metabatSS_coeloUpaSeepOnly.9  | 68.94    | 0.42      | 66.84   | d_Bacteria;p_Dadabacteria;c_UBA1144                                                                  |
| <i>C. singaporensis</i>  | S    | metabatVS_coeloUpaSeepOnly.5  | 69.08    | 0.52      | 66.48   | d_Bacteria;p_Proteobacteria;c_Alphaproteobacteria;o_Caulobacteriales;f_Maricaulaceae;g_Oceanicaulis  |
| <i>C. singaporensis</i>  | S    | metabatVS_coeloUpaSeepOnly.9  | 68.61    | 0.97      | 63.76   | d_Archaea;p_Crenarchaeota;c_Nitrososphaeria;o_Nitrososphaerales;f_Nitrosopumilaceae;g_Nitrosopumilus |
| <i>S. flabelliformis</i> | C    | metabatSS_styUpaCtrlOnly.2    | 83.96    | 0.91      | 79.41   | d_Bacteria;p_Nitrospirata;c_Nitrospiria;o_Nitrospirales;f_UBA8639                                    |
| <i>S. flabelliformis</i> | C    | metabatSS_styUpaCtrlOnly.3    | 85.01    | 0.61      | 81.96   | d_Bacteria;p_Proteobacteria;c_Gammaproteobacteria;o_UBA10353                                         |
| <i>S. flabelliformis</i> | S    | metabatSS_styUpaSeepOnly.2    | 73.97    | 0.35      | 72.22   | d_Bacteria;p_Proteobacteria;c_Gammaproteobacteria;o_UBA4575;f_UBA4575                                |
| <i>S. flabelliformis</i> | S    | metabatSS_styUpaSeepOnly.3    | 82.28    | 1.22      | 76.18   | d_Bacteria;p_Proteobacteria;c_Gammaproteobacteria;o_UBA10353;f_UBA3123                               |
| <i>S. flabelliformis</i> | S    | metabatVS_styUpaSeepOnly.4    | 75.26    | 0         | 75.26   | d_Archaea;p_Crenarchaeota;c_Nitrososphaeria;o_Nitrososphaerales;f_Nitrosopumilaceae;g_Cenarchaeum    |

C: control site; S: seep site; Compl.: Completeness; Contam.: Contamination.

## Supplementary methods

### 3-hydroxypropionate/4-hydroxybutyrate cycle

KO terms associated with the 3-hydroxypropionate/4-hydroxybutyrate cycle were carefully chosen to produce panel a of Figure 3. The vast majority of sponge symbiont genes involved in the HP/HB cycle were assigned to thaumarchaeal scaffolds. Bacterial genes for which no archaeal homologs have yet been identified were generally missing from the metagenomes. The HP/HB cycle in **Figure3** therefore represents KO terms which have been catalogued for Archaea according to gene names, substrates and products as per Konneke et al.<sup>1</sup> and Qin et al.<sup>2</sup> and reflected reactions taking place only in Archaea. The only exception was acetyl-CoA acetyltransferase (K00626), which is present in multiple biochemical pathways so does not contribute exclusively to the HP/HB cycle. The archaeal HP/HB cycle is a topic of current research, hence the following section defines how KOs were selected for construction of **Figure3**, whilst **Supplementary Figure 8** represents relative abundance of KOs used in **Figure3**, and **Supplementary Table 7** contains all KO terms associated with functions performed by HP/HB enzymes (both bacterial and archaeal).

### **Acetyl-CoA/propionyl-CoA carboxylase (Nmar\_0272 and Nmar\_0274)**

According to Qin et al.<sup>2</sup>, *Nmar\_0272*, which encodes acetyl-CoA/propionyl-CoA carboxylase (EC number 6.4.1.2, 6.4.1.3), does not correspond to any KO, whilst *Nmar\_0274*, encoding the same gene, corresponds to K18605. Konneke et al.<sup>1</sup> state that *Nmar\_0272*, *Nmar\_0273* and *Nmar\_0274* correspond to both “acetyl-CoA carboxylase” and “propionyl-CoA carboxylase”. In the KEGG database the “acetyl-CoA/propionyl-CoA carboxylase” function in the HP/HB cycle is represented by the 3 KO terms K18603, K18604 and K18605. All three KOs were included in the current analysis. K15052, which represents a “propionyl-CoA carboxylase” derived from Bacteria was not represented in **Figure3**.

### **Malonyl-CoA reductase (unknown in Archaea)**

Malonyl-CoA reductase is assigned by the KEGG database to K15017 and K14468, neither of which were detected in any of the *C. singaporensis* samples.

### **Malonic semialdehyde reductase (Nmar\_1110)**

According to Qin et al.<sup>2</sup> (**Figure3**), *Nmar\_1110* represents “malonic semialdehyde reductase”, yet the SOM of the same publication lists *Nmar\_1110* with a KEGG annotation as “K18602, succinate semialdehyde reductase [EC:1.1.1.-]”. This is likely to be human error as the KEGG database lists K18602 as “malonic semialdehyde reductase”. In addition, *Nmar\_1110* was biochemically characterized in *Nitrosopumilus maritimus* and the product found to be highly specific to malonic semialdehyde (Otte et al., 2015). Therefore in **Figure3** of the present manuscript, K18602 represents malonic semialdehyde reductase, whilst the archaeal homolog of succinic semialdehyde reductase remains unknown.

### **3-hydroxypropionyl-CoA synthetase (ADP-forming) (Nmar\_1309)**

According to Qin et al.<sup>2</sup>, *Nmar\_1309* is listed as “K18594, 3-hydroxypropionyl-CoA synthetase (ADP-forming) [EC:6.2.1.-]”, which is also consistent with Table 1 of Konneke et al.<sup>1</sup>. The relative abundance of this KO term is therefore represented in **Figure3** as 3-hydroxypropionyl-CoA synthetase.

### ***3-hydroxypropionyl-CoA dehydratase and crotonyl-CoA hydratase (Nmar\_1308)***

According to the Qin et al.<sup>2</sup> SOM dataset, Nmar\_1308 is considered “K01715, 3-hydroxybutyryl-CoA dehydratase (Crotonase) (3-HP/4-HB Cycle enzyme)” but is represented as both 3-hydroxypropionyl-CoA dehydratase and Crotonyl-CoA hydratase on Figure1 of the same paper. In Table 1 of the Konneke et al.<sup>1</sup> publication, Nmar\_1308 corresponds to 3-hydroxypropionyl-CoA dehydratase and crotonyl-CoA hydratase (3-hydroxybutyryl-CoA forming). Further interrogation of the KEGG database showed that this enzyme could also correspond to K15019. Considering the origin of K01715 (exclusively bacterial or unclassified) and K15019 (mostly if not exclusively Archaeal), both 3-hydroxypropionyl-CoA dehydratase and crotonyl-CoA hydratase functions were represented by the relative abundance of K15019 on **Figure3** of the present manuscript.

### ***Acryloyl-CoA reductase (unknown in Archaea)***

Acryloyl-CoA reductase is assigned by the KEGG database to K19745, which was detected in all *C. singaporensis* samples (see **Supplementary Table 7** and Source data file).

### ***Methylmalonyl-CoA epimerase and methylmalonyl-CoA mutase (Nmar\_0953, Nmar\_0954, Nmar\_0958)***

Methylmalonyl-CoA epimerase and methylmalonyl-CoA mutase were consistently represented by three KOs. Qin et al.<sup>2</sup> and Konneke et al.<sup>1</sup> both reported that Nmar\_0953 corresponds to K05606 (methylmalonyl-CoA/ethylmalonyl-CoA epimerase [EC:5.1.99.1]), Nmar\_0954 corresponds to K01848 (methylmalonyl-CoA mutase, N-terminal domain [EC:5.4.99.2]) and Nmar\_0958 corresponds to K01849 (methylmalonyl-CoA mutase, C-terminal domain [EC:5.4.99.2]). These 3 KO terms were therefore used for Methylmalonyl-CoA epimerase and methylmalonyl-CoA mutase in **Figure3**.

### ***Succinyl-CoA reductase (unknown in Archaea)***

Succinyl-CoA reductase is assigned to K15038 in the KEGG database, but was absent from all *C. singaporensis* samples.

### ***Succinic semialdehyde reductase (unknown in Archaea)***

Succinic semialdehyde reductase is assigned to K14465 in the KEGG database, but was found in only one sample from each site and therefore not investigated further.

### ***4-hydroxybutyryl-CoA synthetase (ADP-forming) (Nmar\_0206)***

According to Qin et al.<sup>2</sup>, Nmar\_0206 corresponds to a CoA-binding domain protein (3-HP/4-HB Cycle enzyme), with a “K09181, yfiQ; acetyltransferase” description in the KEGG database. However, Nmar\_0206 is listed as a 4-hydroxybutyryl-CoA synthetase (ADP-forming) in Konneke et al.<sup>1</sup>. Likewise, the KEGG database contains a 4-hydroxybutyryl-CoA synthetase (ADP-forming) entry linked to K18593, and we therefore represent this KO on **Figure3**.

### ***4-hydroxybutyryl-CoA dehydratase (Nmar\_0207)***

Nmar\_0207 is listed as a 4-hydroxybutyryl-CoA dehydratase in both Qin et al.<sup>2</sup> and Konneke et al.<sup>1</sup> and the corresponding KO, K14534, is therefore represented in **Figure3**.



### **3-hydroxybutyryl-CoA dehydrogenase (Nmar\_1028)**

*Nmar\_1028* corresponds to K15016, 3-hydroxybutyryl-CoA dehydrogenase in both Qin et al.<sup>2</sup> and Konneke et al.<sup>1</sup>, and this KO is therefore represented in **Fig.3**.

### **Acetyl-CoA acetyltransferase (Nmar\_0841-Nmar1631)**

*Nmar\_0841* and *Nmar\_1631* correspond to K00626, Acetyl-CoA acetyltransferase, (putative 3-HP/4-HB Cycle enzyme), and this KO is therefore represented in **Fig.3**.

### **Metagenomes-Assembled Genomes**

To assemble genomes bins, IDBA-UD<sup>3</sup> with default parameters was used to first assemble the metagenomes (**Supplementary Note 13**). Each sponge species was processed separately and the three samples from the control site were assembled independently from the three samples at the seep site, resulting in four distinct assemblies. Metagenome-assembled genomes (MAGs) were binned from each assembly using the Metabat default settings “very sensitive” and “super specific” options<sup>4</sup>. Within each site and species, genome bins were dereplicated using dRep<sup>5</sup> to discard bins with sequence similarity > 99%. Bin taxonomy was determined with GTDB-tk<sup>6</sup>. Archaeal bins from *C. singaporensis* at the control site were identical to archaeal bins from the seep site (metabatSS\_coeloUpaCtrlOnly.26). Annotation was restricted to bins with a quality score (defined as completion – [5x contamination]) greater than 70% and was performed using EnrichM developed by J. Boyd (<https://github.com/geronimp/enrichM>). Only bins with quality scores >60% were submitted to NCBI (**Supplementary Table 20**).

## Supplementary Notes

### Supplementary Note 1: Taxonomic Assignment

The microbiome of each sponge species was taxonomically unique and sponge-associated communities were clearly distinct from the microbial community inhabiting the surrounding seawater (**Supplementary Figure 1**). In particular, Archaeal orders with relative abundance > 1% were only detected in sponge samples. A significant shift in the composition of the *C. singaporensis* microbiome was detected between sites (**Supplementary Figure 2**), involving reduced relative abundances of Acidobacteria (from 4.1% to 1.2%), PAUC34f (from 5.3% to 0.4%) and Poribacteria (from 3.8% to 0.6%) at the seep. At the class level, differences included a reduction in Anaerolinea (from 3.5% to 1%) and Gammaproteobacteria (from 11.7% to 6%) at the seep. Within the Proteobacteria, the Rhodospirillales (class Alphaproteobacteria) were more abundant at the control than at the seep (4.6% versus 1.6%). Conversely, the genus *Bdellovibrio* (class Deltaproteobacteria) was more abundant at the seep (3% versus 0%) as was the order EC94 (class Betaproteobacteria, 5.8% versus 0.2%). The *S. flabelliformis* microbiome showed fewer changes in community composition between sites, although a decline in the relative abundance of the order Thiohalorhabdales (from 26.6% to 13.9%) and the family Marinicellaceae (from 2.9% to 1.3%) was found at the seep.

### Supplementary Note 2: Sample partitioning at the functional level

Similarity dendrograms (**Supplementary Figure 3a**) and ordination analyses (**Supplementary Figure 3b** and **Supplementary Figure 4a**) of KO data revealed clear partitioning of the samples functions according to species and to a lesser extent, sites. Consistent with previous studies, seawater microbiomes were functionally distinct from the sponge-associated microbial communities.

### Supplementary Note 3: General features of microbiomes

Microbiomes of the three species showed distinct features, including the number and proportion of significantly different genes enriched at the control or seep site (see main text and **Supplementary Table 1**).

### Supplementary Note 4: Microbial functions in relation to environmental variables

Individual t-tests conducted on twenty-one environmental variables revealed that site had a significant effect on  $p\text{CO}_2$ , pH, concentrations of  $\text{CO}_2$ ,  $\text{CO}_3^{2-}$ ,  $\text{HCO}_3^-$ , DIC, TA, and salinity (**Supplementary Tables 3-6**). However, the variation in salinity between sites was marginal ( $35 \pm 0.63$  ppt on average at the control and  $34.8 \pm 0.54$  ppt on average at the seep, **Supplementary Table 3**). CAP analysis further revealed that the variables most strongly correlated to the distribution of KOs in the ordination were  $\text{CO}_2$  concentration,  $p\text{CO}_2$ , and  $\text{CO}_3^{2-}$  concentration (**Supplementary Figure 4** and **Supplementary Table 6**). Together these results support the primary role of inorganic carbon chemistry in driving the differences in microbial functions between the control and seep sites.

### Supplementary Note 5: ABC transporters

In addition to the changes in relative abundance of ABC transporters presented in the main text, the microbiome of both *C. singaporensis* and *S. flabelliformis* at the seep exhibited a reduced potential for the uptake of oligopeptides (*oppABCDF*, 1.6-times in *C. singaporensis*, 2.3-times in *S. flabelliformis*), the antimicrobial compound microcin (*yejABEF*, 1.9-times in *C. singaporensis*, 1.7-times in *S. flabelliformis*) and iron (via the siderophore uptake system *ABC.FEV.APS* in *C. singaporensis*, 1.6–

times, and iron III uptake complex *afuABC* in *S. flabelliformis*, 1.5-times) (**Supplementary Figure 5** and **Supplementary Figure 6**). Furthermore, the microbiome of *C. singaporensis* at the seep had a significantly lower relative abundance of genes encoding sodium excretion systems (*natAB*, 11.8-times), uptake systems for molybdate and sulfur (*modABC*, 3-times), as well as an enhanced potential for uptake of the osmoprotectant sucrose (alpha-glucoside, *aglEFGK*, 4.3-times) and for release of inner membrane-bound lipoproteins into the periplasm, via the *lolCDE* complex (1.3-times). In contrast, the microbiome of *S. flabelliformis* at the seep exhibited a reduced potential for uptake of the osmoprotectant proline (*proVWX*, 1.6-times), perhaps compensated for by an increased relative abundance of the gene encoding transport/synthesis of the osmoprotectant glycine betaine (*opuABCD*, 3.2-times). P-value for genes encoding ABC transporters can be found in the Source data file.

### **Supplementary Note 6: Eukaryotic-like proteins**

A few genes considered markers of host predation evasion were found in greater proportions at the CO<sub>2</sub> seep, with an increased relative abundance of tetratricopeptide repeats in the microbiomes of both species (5.4-times in *C. singaporensis*, 1.5-times in *S. flabelliformis*) (**Supplementary Figure 7**). Although these protein domains are characteristic of eukaryotic-like proteins (ELPs), which some sponge microbes express and likely use to escape host phagocytosis<sup>7,8</sup>, it is difficult to confirm the biological meaning of these observations without additional analyses. Similarly, *nodI* and *nodJ*, two genes involved in the formation of bacterial nodules in legume species, had a higher relative abundance at the seep in the microbiomes of both species (3.7-times in *C. singaporensis*, 2.7-times in *S. flabelliformis*) (**Figure 2**). In plant symbionts, these two genes encode proteins that export lipochitooligosaccharides or nodulation (nod) factors responsible for the establishment of symbiosis<sup>9</sup>, although interpretation of our results is hindered by a lack of information on their role in sponges.

### **Supplementary Note 7: Carbonic anhydrase**

Two genes encoding carbonic anhydrase were found in significantly lower relative abundance at the seep than at the control site in *C. singaporensis* microbiomes, which could indicate a diminished selection pressure at the seep on microbes which lack carbonic anhydrase (main text and **Supplementary Figure 9**).

### **Supplementary Note 8: Nitrogen cycle and glutamate-derived arginine biosynthesis in Archaea**

The *C. singaporensis* microbiome exhibited a higher capacity for ammonium production via creatinine degradation at the control, and via creatine and arginine degradation at the seep (main text, **Supplementary Figure 10** and **Supplementary Table 8**). Arginine biosynthesis from glutamate can be divided into two phases: the first converting glutamate into ornithine, the second converting ornithine into arginine (**Supplementary Figure 11**). In Bacteria such as *E. coli*, the first phase typically occurs via i) enzymes converting L-glutamate into N-acetylglutamate, encoded by *argA/J* and ii) a series of reactions converting N-acetylglutamate into ornithine, encoded by the *argBCDE* cluster (EC 2.3.1.1, 2.7.2.8, 1.2.1.38 and 2.6.1.11 successively) (**Supplementary Figure 11**). The *argAJBCDE* cluster was found in the *C. singaporensis* metagenomes and, as expected, was almost exclusively assigned to bacterial scaffolds (**Supplementary Table 9**). All genes showed a higher relative abundance at the control than at the seep, indicating a diminished capacity for bacteria to produce arginine at the seep

**(Supplementary Figure 12).** In Archaea, glutamate-driven arginine biosynthesis has only recently been characterised in *Sulfolobus acidocaldarius*<sup>10,11</sup>. Arginine biosynthesis in Archaea follows a complex process involving an amino acid carrier protein which binds L-glutamate, encoded by the *lysW* gene. The first reaction corresponding to that catalysed by argA/J is performed by LysX-argX in the presence of the carrier protein LysW. The subsequent reaction catalysed by the LysZYJK complex leads to the biosynthesis of arginine or lysine, depending on whether the LysX/argX initial substrate is  $\alpha$ -aminoadipate (AAA) or L-glutamate, respectively. Substrate specificity is determined by the identity of residues 259 and 260 on the *lysX/argX* gene, with glycine-phenylalanine (Gly-Phe) leading to lysine biosynthesis and asparagine-serine (Asn-Ser) or asparagine-threonine (Asn-Thr) leading to arginine biosynthesis. All six genes (*lysW*, *lysX-argX*, *lysZ*, *lysY*, *lysJ* and *lysK*) were found in the metagenomes of *C. singaporensis* and all were more abundant at the seep than at the control site (**Supplementary Figure 12**). Inspection of residues 259 and 260 of the *lysX-argX* gene (K05827 in the KEGG Orthology nomenclature) confirmed the presence of both homologs (specifically glycine-lysine (Gly-Lys) and Asn-Thr at positions 259-260) and therefore the capacity to biosynthesize both lysine and arginine via this pathway (**Supplementary Table 10**). Whilst two-thirds of the *lysWXZYJK* gene cluster counts were found on archaeal scaffolds at the control, this proportion increased to 97% at the seep, suggesting that the increase in Archaea at the seep led to a rise in glutamate-driven arginine biosynthesis (**Supplementary Table 9**). In contrast to *C. singaporensis*, *S. flabelliformis* microbiome displayed a general decreased potential for nitrogen cycling at the seep and consequently glutamine and glutamate biosynthesis (main text and **Supplementary Figure 13**) with almost no contribution from Archaea (**Supplementary Table 11**).

### **Supplementary Note 9: Taurine and homoserine degradation**

As reported in the main text, the genomic potential for taurine degradation and associated sulfur assimilation were reduced at the seep in *S. flabelliformis*. This was supported by the relative abundances of seven genes involved in these pathways (**Supplementary Figure 14** and **Supplementary Table 12**).

### **Supplementary Note 10: Sulfur metabolism**

*C. singaporensis* microbiomes presented a reduced potential for sulfur assimilation at the seep, indicated by the 10-fold significant decrease in relative abundance of both subunits of the adenylylsulfate reductase (*aprA* and *aprB*, 11.5-times and 9.8-times respectively, ANOVA  $p < 0.01$  for both), which catalyses the interconversion of adenylylsulphate into sulfite and vice versa (**Supplementary Figure 15**). Both subunits of the dissimilatory sulfite reductase (*dsrA* and *dsrB*) also showed a large decrease at the seep (5.7-times and 6.2-times, ANOVA  $p < 0.01$  for both). Lower proportions of many taxa could have led to this decreased potential for sulfate reduction at the seep (**Supplementary Table 13**). In contrast, the *S. flabelliformis* microbiome might benefit from a greater potential for energy production via thiosulfate oxidation at the seep, with thiosulfate potentially originating from the seep environment. This enhanced capacity could arise from a (mostly non-significant) increase in the relative abundance of four of the seven genes encoding the *sox* cluster *soxXYZABCD*, namely *soxC*, *soxZ*, *soxY*, *soxX* (4.2-times, 1.9-times, 2.4-times, 2.4-times respectively) (**Supplementary Figure 16**). The *sox* complex genes were mostly assigned to *Gammaproteobacteria* (**Supplementary Table 14**), including purple-sulfur bacteria (*Chromatiales*), perhaps indicating that the thiosulfate could be used for anoxygenic photosynthesis.

### Supplementary Note 11: Cobalamin biosynthesis

Microbial symbionts of *C. singaporensis* possessed the complete pathway for cobalamin (vitamin B12) biosynthesis and the relative abundance of these genes was 60% higher in sponges at the CO<sub>2</sub> seep (totalling 1% vs 0.6% average relative abundance at the seep and control, respectively (ANOVA,  $p = 0.03$ ); **Figure 2b**, **Figure 2c** and **Supplementary Figure 17**). Cobalamin biosynthesis, a major component of the porphyrin and chlorophyll metabolism KEGG pathway, can take place both aerobically and anaerobically, however oxygen availability did not have a significant effect on cobalamin biosynthesis genes (**Supplementary Table 15**). Scaffolds carrying cobalamin synthesis genes from both the aerobic and anaerobic pathways primarily originated from Thaumarchaeota (26% at the seep vs 19% at the control), followed by Proteobacteria and Cyanobacteria (**Supplementary Table 16**). While this suggests that sponge-associated Thaumarchaeota can use aerobic and anaerobic pathways as has been reported for free-living marine Thaumarchaeota<sup>12</sup>, “anaerobic” vitamin B12 biosynthesis would actually happen under low-oxygen, rather than truly anoxic conditions, given that Thaumarchaeota require O<sub>2</sub> to perform ammonia oxidation<sup>12,13</sup>. Genes encoding three cobalamin-dependent enzymes were detected in the *C. singaporensis* microbiome, with no significant difference in relative abundance between sites (data not shown). The higher microbial potential for cobalamin biosynthesis at the seep without a broadly higher potential for its utilisation suggests that cobalamin might be predominantly used by the sponge host. Differential utilisation of cobalamin amongst microbial taxa was evident across sites though, with the cobalamin-dependent enzyme methylmalonyl-coA mutase (part of the 3-Hydropropionate/4-hydroxybutyrate (HP/HB) cycle) largely present on bacterial or unclassified scaffolds at the control site (26% ± 17%) but on Thaumarchaeota scaffolds at the seep (81% ± 4%).

### Supplementary Note 12: Thiamine biosynthesis

An increased capacity for thiamin (vitamin B1) biosynthesis was evident in the *S. flabelliformis* microbiome at the seep. Vitamin B1 is synthesized *de novo* by 76% of cultured marine bacteria<sup>14</sup>. Thiamin biosynthesis takes place in four phases: i) synthesis of 4-amino-5-hydroxymethylpyrimidine diphosphate (HMP moiety), ii) synthesis of 4-methyl-5-(2-phosphoethyl)-thiazole (THZ-P moiety), iii) linking these two compounds to form thiamin monophosphate (TMP) and iv) phosphorylation of TMP into thiamin pyrophosphate (TDP), the active form of vitamin B1<sup>15</sup>. Some microbial species have the capacity to synthesize only either HMP or THZ-P, whilst acquiring the missing compound from the environment. *S. flabelliformis* symbionts had the potential to synthesize HMP *de novo* via the degradation of 5-amino-1-(5-phospho-β-D-ribose) imidazole (AIR), a product of purine metabolism. The two genes required, *thiC* and *thiD*, were significantly more abundant (2-3 times) at the seep than at the control site (**Supplementary Figure 18**). All genes required for the synthesis of THZ-P from 2-glyceraldehyde-3-phosphate, glycine and cysteine were present in the metagenome, with the exception of *thiF*. The two genes involved in glycine degradation, *thiO* and *thiG*, were also significantly more abundant (2-3 times) at the seep, as were *thiE* and *thiL* which encode the last two enzymes for the successive formation of TMP and TDP. Scaffolds carrying these genes were primarily assigned to Proteobacteria, Thaumarchaeota and unclassified phyla (**Supplementary Table 17**). In addition, Cyanobacteria contributed a notable proportion of scaffolds carrying *thiO* and *thiG*. No consistent pattern was found in the taxonomic distribution of scaffolds that could explain the significant increase in the relative abundance of *thiO*, *thiG*, *thiC*, *thiD*, *thiE* and *thiL* at the seep.

### Supplementary Note 13: Metagenome-assembled genomes

**Supplementary Table 20** provides details of the Metagenome-assembled Genomes. All KOs listed as thaumarchaeal for the HP/HB cycle in **Supplementary Table 7**, and for urease, agmatinase and arginine decarboxylase in **Supplementary Table 8** were found in the *Nitrosopumilus* bin metabatVS\_coeloUpaCtrlOnly.21 (**Supplementary Table 20**), confirming that *C. singaporensis* possesses *Nitrosopumilus* symbionts with the genomic potential to perform the HPHB cycle described in **Figure3a** and urease formation and degradation described in **Figure3b**.

### Supplementary references

- 1 Konneke, M. *et al.* Ammonia-oxidizing archaea use the most energy-efficient aerobic pathway for CO<sub>2</sub> fixation. *Proc. Natl. Acad. Sci. U. S. A.* **111**, 8239-8244 (2014).
- 2 Qin, W. *et al.* Stress response of a marine ammonia-oxidizing archaeon informs physiological status of environmental populations. *ISME J.* **12**, 508-519 (2018).
- 3 Peng, Y., Leung, H. C. M., Yiu, S. M. & Chin, F. Y. L. IDBA-UD: a de novo assembler for single-cell and metagenomic sequencing data with highly uneven depth. *Bioinformatics* **28**, 1420-1428 (2012).
- 4 Kang, D. D., Froula, J., Egan, R. & Wang, Z. MetaBAT, an efficient tool for accurately reconstructing single genomes from complex microbial communities. *PeerJ* **3**, e1165 (2015).
- 5 Olm, M. R., Brown, C. T., Brooks, B. & Banfield, J. F. dRep: a tool for fast and accurate genomic comparisons that enables improved genome recovery from metagenomes through de-replication. *ISME J.* **11**, 2864 (2017).
- 6 Parks, D. H. *et al.* A standardized bacterial taxonomy based on genome phylogeny substantially revises the tree of life. *Nat. Biotechnol.* **36**, 996 (2018).
- 7 Reynolds, D. & Thomas, T. Evolution and function of eukaryotic-like proteins from sponge symbionts. *Mol. Ecol.* **25**, 5242-5253 (2016).
- 8 Diez-Vives, C., Moitinho-Silva, L., Nielsen, S., Reynolds, D. & Thomas, T. Expression of eukaryotic-like protein in the microbiome of sponges. *Mol. Ecol.* **26**, 1432-1451 (2017).
- 9 Cardenas, L., Dominguez, J., Santana, O. & Quinto, C. The role of the nodI and nodJ genes in the transport of Nod metabolites in *Rhizobium etli*. *Gene* **173**, 183-187 (1996).
- 10 Ouchi, T. *et al.* Lysine and arginine biosyntheses mediated by a common carrier protein in *Sulfolobus*. *Nat. Chem. Biol.* **9**, 277 (2013).
- 11 Tomita, T. Structure, function, and regulation of enzymes involved in amino acid metabolism of bacteria and archaea. *Biosci. Biotechnol. Biochem.* **81**, 2050-2061 (2017).
- 12 Doxey, A. C., Kurtz, D. A., Lynch, M. D. J., Sauder, L. A. & Neufeld, J. D. Aquatic metagenomes implicate Thaumarchaeota in global cobalamin production. *ISME J.* **9**, 461-471 (2015).
- 13 Peng, X. F., Jayakumar, A. & Ward, B. B. Community composition of ammonia-oxidizing archaea from surface and anoxic depths of oceanic oxygen minimum zones. *Front. Microbiol.* **4** (2013).
- 14 Sañudo-Wilhelmy, S. A., Gómez-Consarnau, L., Suffridge, C. & Webb, E. A. The Role of B Vitamins in Marine Biogeochemistry. *Annu. Rev. Mar. Sci.* **6**, 339-367 (2014).
- 15 Park, J.-H. *et al.* Biosynthesis of the Thiazole Moiety of Thiamin Pyrophosphate (Vitamin B1). *Biochemistry* **42**, 12430-12438 (2003).
